1 **Parkinson-associated *SNCA* enhancer variants revealed by open chromatin in mouse dopamine**  
2 **neurons**

3 Sarah A. McClymont<sup>1</sup>, Paul W. Hook<sup>1</sup>, Alexandra I. Soto<sup>2</sup>, Xylena Reed<sup>1</sup>, William D. Law<sup>1</sup>, Samuel J.  
4 Kerans<sup>1</sup>, Eric L. Waite<sup>1</sup>, Nicole J. Briceno<sup>1</sup>, Joey F. Thole<sup>1</sup>, Michael G. Heckman<sup>3</sup>, Nancy N. Diehl<sup>3</sup>, Zbigniew  
5 K. Wszolek<sup>4</sup>, Cedric D. Moore<sup>5</sup>, Heng Zhu<sup>5</sup>, Jennifer A. Akiyama<sup>6</sup>, Diane E. Dickel<sup>6</sup>, Axel Visel<sup>6,7,8</sup>, Len A.  
6 Pennacchio<sup>6,7,9</sup>, Owen A. Ross<sup>2,10,11</sup>, Michael A. Beer<sup>1,12</sup>, Andrew S. McCallion<sup>1,13,14,\*</sup>

7  
8 <sup>1</sup> McKusick Nathans Institute of Genetic Medicine, Johns Hopkins University School of Medicine,  
9 Baltimore, Maryland, USA.

10 <sup>2</sup> Department of Neuroscience, Mayo Clinic, Jacksonville, Florida, USA.

11 <sup>3</sup> Division of Biomedical Statistics and Informatics, Mayo Clinic, Jacksonville, Florida, USA.

12 <sup>4</sup> Department of Neurology, Mayo Clinic, Jacksonville, Florida, USA.

13 <sup>5</sup> Department of Pharmacology and Molecular Sciences, Johns Hopkins University School of Medicine,  
14 Baltimore, Maryland, USA.

15 <sup>6</sup> Environmental Genomics and Systems Biology Division, Lawrence Berkeley National Laboratory,  
16 Berkeley, California, USA.

17 <sup>7</sup> US Department of Energy Joint Genome Institute, Walnut Creek, California, USA.

18 <sup>8</sup> School of Natural Sciences, University of California, Merced, Merced, California, USA.

19 <sup>9</sup> Comparative Biochemistry Program, University of California, Berkeley, California, USA.

20 <sup>10</sup> Mayo Graduate School, Neurobiology of Disease, Jacksonville, Florida, USA.

21 <sup>11</sup> Department of Clinical Genomics, Jacksonville, Florida, USA.

22 <sup>12</sup> Department of Biomedical Engineering, Johns Hopkins University School of Medicine, Baltimore,  
23 Maryland, USA.

24 <sup>13</sup> Department of Comparative and Molecular Pathobiology, Johns Hopkins University School of  
25 Medicine, Baltimore, Maryland, USA.

26 <sup>14</sup> Department of Medicine, Johns Hopkins University School of Medicine, Baltimore, Maryland, USA.

27 \*, To whom correspondence should be addressed: andy@jhmi.edu

28

29

30 **ABSTRACT**

31 The progressive loss of midbrain (MB) dopaminergic (DA) neurons defines the motor features of  
32 Parkinson disease (PD) and modulation of risk by common variation in PD has been well established  
33 through GWAS. Anticipating that a fraction of PD-associated genetic variation mediates their effects  
34 within this neuronal population, we acquired open chromatin signatures of purified embryonic mouse  
35 MB DA neurons. Correlation with >2,300 putative enhancers assayed in mice reveals enrichment for MB  
36 cis-regulatory elements (CRE), data reinforced by transgenic analyses of six additional sequences in  
37 zebrafish and mice. One CRE, within intron 4 of the familial PD gene *SNCA*, directs reporter expression in  
38 catecholaminergic neurons of transgenic mice and zebrafish. Sequencing of this CRE in 986 PD patients  
39 and 992 controls reveals two common variants associated with elevated PD risk. To assess potential  
40 mechanisms of action, we screened >20,000 DNA interacting proteins and identify a subset whose  
41 binding is impacted by these enhancer variants. Additional genotyping across the *SNCA* locus identifies a  
42 single PD-associated haplotype, containing the minor alleles of both of the aforementioned PD-risk  
43 variants. Our work posits a model for how common variation at *SNCA* may modulate PD risk and  
44 highlights the value of cell context-dependent guided searches for functional non-coding variation.

## 45 INTRODUCTION

46 Parkinson disease (PD) is a common progressive neurodegenerative disorder characterized by  
47 preferential and extensive degeneration of dopaminergic (DA) neurons in the *substantia nigra*<sup>1,2</sup>. This  
48 loss of midbrain (MB) DA neurons disrupts the nigrostriatal pathway and results in the movement  
49 phenotypes observed in PD. While this disorder affects approximately 1% of people over 70 years old  
50 worldwide<sup>3</sup>, the mechanisms underlying genetic risk of sporadic PD in the population remains largely  
51 unknown. Familial cases of PD with known pathogenic mutations are better understood but account for  
52  $\leq 10\%$  of PD cases<sup>4</sup>.

53 The  $\alpha$ -synuclein gene (*SNCA*) is commonly disrupted in familial PD through missense mutations  
54 predicted to promote misfolding<sup>5-7</sup> or genomic multiplications, resulting in an over-expression  
55 paradigm<sup>8</sup>. The *SNCA* locus has also been shown by genome-wide association studies (GWAS) to harbour  
56 common variation modulating risk of sporadic PD, with far stronger association signals observed in  
57 comparison to all other nominated PD risk loci<sup>9</sup>. In the same way, common variation at over 40  
58 additional loci have been implicated in PD<sup>10</sup>, but the genes modulated and causal variants responsible  
59 for elevating risk remain largely undetermined.

60 That most GWAS-implicated variants are non-coding<sup>11</sup> is a major source of this uncertainty, obstructing  
61 the identification of: 1) the causative variant at a locus; 2) the context in which the variation is acting  
62 and; 3) the mechanism by which a variant asserts its effect on disease risk.

63 GWAS are inherently biologically agnostic and their exploitation of linkage disequilibrium (LD) structure  
64 frequently results in many variants being implicated at any one locus, with no one variant prioritized  
65 over those in LD. One method to prioritize non-coding variants is to examine the chromatin status at  
66 that locus<sup>11-13</sup>. Accessible chromatin is more likely to be functional and variants therein may impact that  
67 activity, more so than those variants residing in inaccessible chromatin. Chromatin accessibility is  
68 dynamic, often varying across cell types and developmental time. Understanding the cellular context in  
69 which variation acts is therefore critical to begin the process of prioritizing variants and querying their  
70 methods of action<sup>11,14-16</sup>.

71 Exploiting the preferential vulnerability of MB DA neurons in PD, we have prioritized DA neurons as the  
72 biological context in which a fraction of PD-associated variation likely acts. DA neurons in other brain  
73 regions, such as the forebrain (FB), provide a related substrate that is less vulnerable to loss in PD. We  
74 sought to use chromatin data from *ex vivo* populations of DA neurons to investigate the contributions of

75 non-coding variation to PD risk. To maximize the specificity of the biological context, we generated  
76 chromatin signatures of purified mouse MB and FB DA neurons. We examined the resulting regulatory  
77 regions for their ability to direct *in vivo* reporter expression and developed a regulatory sequence  
78 vocabulary specific to DA neurons. In doing so, we identified a novel MB DA regulatory element that falls  
79 within intron 4 of *SNCA* and demonstrate its ability to direct reporter expression in catecholaminergic  
80 neurons of transgenic mice and zebrafish. Furthermore, this enhancer harbours two common variants  
81 falling in a haplotype that we determine to be associated with PD risk. We demonstrate these enhancer  
82 variants impact protein binding and we propose a model for how the variants and the haplotype at large  
83 contribute to *SNCA* regulatory control. This work illustrates the power of cell context-dependent guided  
84 searches for the identification of disease associated and functional non-coding variation.

## 85 **RESULTS**

### 86 **ATAC-seq identifies open chromatin in MB and FB DA neurons**

87 To identify regions of open chromatin in DA neurons, we performed ATAC-seq<sup>17</sup> on ~50,000 fluorescent-  
88 activated cell sorting (FACS)-isolated cells (per replicate) from microdissected regions of the MB and FB  
89 of embryonic day 15.5 (E15.5) Tg(*Th*-EGFP)DJ76Gsat BAC transgenic mice<sup>18</sup> (**Figure 1a**). This mouse line  
90 expresses EGFP under the control of the tyrosine hydroxylase (*Th*) locus, labeling catecholaminergic  
91 neurons (i.e.: DA, noradrenergic, and adrenergic neurons). To confirm capture of the corresponding  
92 catecholaminergic neurons, we performed RT-qPCR on the isolated reporter-labelled cells, establishing  
93 them to be enriched for DA neuronal markers relative to unlabelled populations from the same  
94 dissected tissues (**Supplemental Figure 1**).

95 To evaluate the ATAC-seq libraries, we examined the called peaks and read pile-ups with the Integrative  
96 Genomics Viewer (IGV)<sup>19,20</sup> and quantified the correlation between brain regions and within replicates. A  
97 representative browser trace at the *Th* locus in both MB and FB libraries is presented in **Figure 1b**.  
98 Replicates are well correlated: MB library replicates have an average correlation of 0.72 (**Figure 1c**), and  
99 FB replicates are more correlated at  $r = 0.86$  (**Figure 1d**). Given the robust correlation between  
100 replicates, we pooled all reads from the same brain region and called peaks on this unified set to  
101 increase our power to detect regions of open chromatin. As a result, we identified 104,217 regions of  
102 open chromatin in the MB DA neurons and 87,862 regions in the FB. MB and FB libraries are moderately  
103 well correlated (average  $r = 0.64$ ; **Supplemental Figure 2**), with approximately 60% of MB peaks also  
104 represented in the FB libraries.

105 To assess these catalogues for characteristics of functionality, we examined the sequence constraint  
106 underlying the called regions of open chromatin, excluding peaks that overlap promoters. Promoters are  
107 typically accessible<sup>21</sup> and thus, we aimed to reduce the inflation of sequence conservation due to highly  
108 conserved promoter-overlapping ATAC-seq peaks. Despite removal of these highly conserved peaks, we  
109 observed a high degree of sequence constraint underlying open chromatin peaks compared to  
110 background (**Figure 1e**). The fact that elements in these libraries of putative cis-regulatory elements  
111 (CREs) are constrained, highlights their likely functional significance.

112 To further examine the catalogues for biological relevance, we explored the gene ontology (GO) terms  
113 of nearby genes. While CREs are not restricted to acting solely on the nearest gene, this restriction is  
114 often used as a proxy in the absence of other information. To bolster our predictions, we also generated  
115 bulk RNA-seq data on these same populations of sorted cells and used these data to examine the GO  
116 terms of the nearest expressed gene (RPKM  $\geq 1$ ). While still imperfect, implementing this as a proxy for  
117 function results in GO terms enriched for neuronal functions in both MB and FB catalogues (**Figures 1f,**  
118 **g**). Thus, we establish these catalogues are enriched for putative CREs likely directing the expression of  
119 genes with key roles in neuronal biology.

#### 120 **Candidate regulatory regions are capable of directing expression *in vivo***

121 Although our candidate CRE catalogues appear to be enriched for functional elements on the basis of  
122 sequence conservation and GO, both of these metrics are indirect surrogates for true measures of  
123 function. To more directly measure the biological relevance of the catalogues and to identify enhancers,  
124 we assessed the capability of the candidate CREs to direct expression *in vivo*.

125 We took advantage of the large repository of elements that have already been tested in *lacZ* reporter  
126 assays *in vivo* and catalogued in the VISTA enhancer browser<sup>22</sup> (accessed September 4, 2016). Overlap  
127 between our catalogues and all 2,387 elements in the VISTA enhancer browser, which were scored for  
128 their ability to direct *lacZ* reporter expression in E11.5 mice, was quantified (**Supplemental Table 1**). Of  
129 the 1,264 elements in VISTA identified as enhancers, 786 were present in the MB catalogue and 719  
130 were present in the FB catalogue (**Figure 2a**). Examining the overlap of the FB and MB catalogues with  
131 enhancers demonstrated to direct expression in either non-neuronal or neuronal tissues, we observed  
132 that 42-47% of enhancers reported to direct expression in non-neuronal tissues are present in the  
133 catalogues. By contrast, 71-76% of enhancers that direct expression in one or more regions of the brain  
134 overlapped the FB and MB catalogues (**Figure 2b**) confirming an abundance of brain enhancers in our

135 catalogues. Stratifying these confirmed neuronal enhancers on the basis of their expression patterns in  
136 VISTA, we observed an abundance of MB-specific enhancers in our MB catalogue, and an abundance of  
137 FB-specific enhancers in our FB catalogue, with 77% of MB- and FB-specific enhancers in VISTA captured  
138 in our MB and FB catalogues, respectively (**Figure 2c**). Collectively, these data establish that our region-  
139 specific catalogues capture region-specific, active CREs with high efficiency.

140 To extend our assessment of the biological activity of sequences within these catalogues, we focused on  
141 an additional five candidate CREs not already tested in the VISTA browser and evaluated their ability to  
142 act as enhancers in *lacZ* reporter mice and in transgenic zebrafish TdTomato reporter assays. All five  
143 regions were represented by robust peaks in both the MB and FB catalogues (**Supplemental Figure 3**).  
144 Two regions, one in the first intron of *Kcnq3* and the other downstream of *Foxg1*, were additionally  
145 prioritized using H3K27Ac ChIP-seq from a variety of tissues from E11.5 and E15.5 embryonic mice,  
146 seeking to limit our selection to candidate enhancers predicted to have neuronal-specific activity. The  
147 remaining three candidate CREs were selected on their proximity to genes important in DA neuron  
148 biology. We selected sequences at *Foxa2* and *Nr4a2*, as both are key transcription factors (TFs) in the  
149 development and maintenance of DA neurons<sup>23-26</sup>. The final region, located in an intron of *Crhr1*, was  
150 selected as this locus has been implicated in PD by GWAS<sup>9</sup> and our group has recently prioritized this  
151 gene as a candidate for PD risk<sup>27</sup>. All selected sequences were lifted over to hg19, facilitating the  
152 identification and assay of their corresponding human sequence intervals.

153 When tested in transgenic reporter mice at E11.5 (**Supplemental Figure 3**), two of the five regions  
154 (those near *KCNQ3* and *FOXA2*) were validated as enhancers (**Figure 2c, g**). Recognizing that a disparity  
155 exists between the developmental time at which we generated the catalogues (E15.5) and when the  
156 data was assayed (E11.5), which may compromise validation rates, we also assayed each sequence  
157 across multiple time points in zebrafish. All assayed regions except that at *KCNQ3* directed reporter  
158 expression in mosaic transgenic zebrafish (**Figures 2d, e, f, g**). All five regions displayed enhancer activity  
159 *in vivo* in neuronal tissues in one or both transgenic assays. Our transgenic animal experiments  
160 corroborate the results of the retrospective VISTA enhancer browser intersection; implying that our  
161 catalogues of candidate CREs are biologically active and enriched for sequences capable of driving  
162 neural expression *in vivo*.

163

## 164 **Candidate CREs are enriched for TF motifs active in DA neurons**

165 To identify sequence modules (kmers) predicted to contribute regulatory activity of putative CREs in our  
166 catalogues, we applied the machine learning algorithm, gkm-SVM<sup>28</sup>. The resulting regulatory  
167 vocabularies of kmers had high predictive power (auROC<sub>MB</sub> = 0.915, auROC<sub>FB</sub> = 0.927). We rank ordered  
168 and collapsed related kmers to reveal motifs enriched in the putative CREs and their corresponding TFs  
169 (**Figures 3a, e, i, m**). In the MB, the four most enriched motifs correspond to Rfx1, Foxa2, Ascl2, and  
170 Nr4a2. Given the degeneracy of binding motifs within TF families, we consulted the bulk RNA-seq data  
171 for each of the implicated TF families and examined the relative expression levels to prioritize which TFs  
172 are most likely producing the observed motif enrichments (**Figures 3b, f, j, n**). While no member of the  
173 Rfx family has been canonically associated with MB DA neurons, we anticipate Rfx3 and Rfx7, as the two  
174 highest expressed Rfx genes, to likely be active in MB DA neurons and driving this motif enrichment  
175 (**Figure 3b**). Foxa1, and more specifically, Foxa2 are both known to DA neuron biology<sup>23,29</sup> and both are  
176 highly expressed in the MB DA neurons (**Figure 3f**). Regarding enrichment for the Ascl family, Ascl1 is  
177 known to be involved in DA neuron biogenesis<sup>30</sup> and is more highly expressed than any other TF in the  
178 family (**Figure 3j**). Finally, Nr4a2 is both canonically associated with DA neurons and required for their  
179 development<sup>26</sup>; we observe it to be highly expressed in MB DA neurons (**Figure 3n**). Examining the  
180 sequences underlying the CRE catalogues, we identified TF families known and unknown to DA neuron  
181 biology and further refined the TF associations using expression data.

182 We also examined the qualities that differentiate MB CREs from FB CREs by examining the sequences  
183 underlying MB-specific and FB-specific regions. We developed a vocabulary that discriminates MB and  
184 FB regions with high predictive power (auROC = 0.926) and identified kmers enriched in MB-specific  
185 peaks where the top corresponding TFs are Foxa1/2 and Nr4a2 (**Supplemental Figure 4**). We confirmed  
186 this MB bias by again considering the bulk RNA-seq for these genes. As expected, these TFs are more  
187 highly expressed in the MB where *Nr4a2* is present at 12-fold higher levels in the MB (135 RPKM in the  
188 MB vs 11 RPKM in the FB) and *Foxa1/2* are not expressed in the FB, but are present in the MB (*Foxa1*: 28  
189 RPKM, *Foxa2*: 7 RPKM). Not only do we identify Foxa1/2 and Nr4a2 as more active in MB DA neurons  
190 than in the FB, we did so solely by comparing their role in the vocabulary of MB-specific candidate CREs  
191 versus FB-specific CREs.

192 In a parallel strategy to identify TFs actively engaging the DNA in MB DA neurons, we performed TF  
193 footprinting in a single deeply sequenced MB ATAC-seq library. Doing so, we confirm that two of the TFs  
194 prioritized by gkm-SVM leave robust footprints. The motif corresponding to Rfx binding results in a

195 dearth of cuts directly over predicted binding sites (**Figure 3c**). The same can be seen to a lesser extent  
196 for the motif corresponding to Foxa1/2 (**Figure 3g**). By contrast, motifs corresponding to Ascl1 or Nr4a2  
197 fail to leave a robust mark on the chromatin availability (**Figures 3k, o**). These footprinting data  
198 substantiate the claim that the Rfx family of TFs and Foxa1/2 are active in MB DA neuron CREs.

199 We confirmed that these sequences are indeed enriched in the catalogues by examining the pileup of  
200 reads overlapping all genome-wide predicted motif binding sites for each motif identified by gkm-SVM.  
201 We see an abundance of reads over predicted binding sites of all four motifs (**Figures 3d, h, l, p**), with  
202 the strongest enrichment overlapping Rfx and Ascl1 motif sites (**Figures 3d, l**). Despite the less robust  
203 footprint generated at the Ascl1, this TF clearly underlies a larger than expected proportion of CREs in  
204 the MB catalogue. The integration of a support vector machine learning algorithm as applied to the  
205 sequences underlying open chromatin regions with footprinting analysis in the same chromatin  
206 substrate powerfully identifies TFs that are important for DA neuron biology and suggests the Rfx family  
207 of TFs, Foxa1/2, Ascl1, and Nr4a2 are actively influencing gene expression in the MB DA neurons.

#### 208 **A candidate CRE in intron 4 of SNCA is associated with PD risk**

209 Having established the biological robustness of the CRE catalogue, we moved to exploit these data to  
210 investigate how non-coding variation therein may be contributing to PD risk; given  $\alpha$ -synuclein's  
211 established role in PD pathogenesis, we prioritized this locus for investigation. We first noted that *Snca*  
212 expression differs significantly between the MB and FB DA neurons in our bulk RNA-seq (**Figure 4b**).  
213 Examining the chromatin accessibility at the *Snca* locus, the MB and FB are largely the same with the  
214 exception of one robust peak in intron 4 (mm9: chr6:60,742,503-60,744,726) that is present in the MB  
215 and completely absent in the FB (**Figure 4a**). DNase hypersensitivity site (DHS) linkage<sup>21,31</sup> suggests that  
216 this putative CRE interacts with the *SNCA* promoter. Given the MB-specificity of this putative CRE and  
217 indications that it interacts with the *SNCA* promoter, we anticipated this region to be a driving force  
218 behind the MB-specific expression of *Snca*.

219 To test this hypothesis, we assayed whether the central portion of this putative CRE, when lifted over to  
220 hg19 (chr4:90,721,063-90,722,122), is capable of directing appropriate reporter expression in transgenic  
221 zebrafish and mouse reporter assays. Stable transgenesis of zebrafish indicates that this CRE directs  
222 reporter expression at 72 hours post fertilization in the locus coeruleus, a key population of  
223 catecholaminergic neurons preferentially degenerated in PD<sup>32</sup>, and along the catecholaminergic tract  
224 through the hindbrain, which is largely composed of DA neurons<sup>33</sup> (**Figure 4c**). Additionally, we observe



225 reporter expression throughout the diencephalic catecholaminergic cluster with projections to the  
226 subpallium, which is analogous to mammalian dopaminergic projections from the ventral midbrain to  
227 the striatum<sup>34</sup>. Reporter expression in these transgenic zebrafish is largely consistent with an enhancer  
228 active in catecholaminergic populations.

229 To further evaluate this CRE in a mammalian system, we generated *lacZ* reporter mice and examined  
230 reporter activity across developmental time. Whole mount E12.5 reporter mice indicate this enhancer  
231 directs exquisitely restricted expression in Th+ populations, including the dorsal root ganglia, extending  
232 into the sympathetic chain, and throughout the cranial nerves (particularly the trigeminal). Additional  
233 diffuse staining is noted throughout the MB and FB (**Figure 4d**). Specifically examining the brains of *lacZ*  
234 animals at E15.5, reporter expression is identified in the MB and hypothalamus, with strong expression  
235 through the amygdala/piriform cortex and along the anterior portion of the sympathetic chain (**Figure**  
236 **4e**); similar reporter patterns are seen at P7 (**Figure 4f**). At P30, we detect reporter activity in the  
237 amygdala, hypothalamus, thalamus, periaqueductal grey area, brain stem, and importantly, in the  
238 *substantia nigra* and ventral tegmental area (**Figure 4g**). By contrast, in aged *lacZ* reporter mice (574  
239 days old, ~19 months), we only detect strong reporter expression in the brain stem and observe weak  
240 reporter expression in the amygdala (**Figure 4h**). Collectively, the regions in which we detect reporter  
241 activity reflect those compromised in PD; Lewy bodies (aggregates of  $\alpha$ -synuclein) have been detected in  
242 the locus coeruleus, sympathetic chain, amygdala, hypothalamus, ventral tegmental area,  
243 periaqueductal grey area of PD patients<sup>35-39</sup>, and critically the preferential degradation of the *substantia*  
244 *nigra* is the pathological hallmark of PD progression<sup>2</sup>. This enhancer directs region-specific appropriate  
245 expression throughout development in key locations concordant with SNCA activity in PD pathogenesis.

246 Following confirmation of this CRE's regulatory activity in brain regions associated with PD, we next  
247 inspected this sequence for PD-associated variation. We sequenced across this interval in 986 PD  
248 patients and 992 controls and identified 14 variants (**Supplemental Table 2**), 4 of which were common  
249 and present in both cases and controls with a minor allele frequency greater than 5%. Of these, two  
250 tightly linked variants ( $r^2 = 0.934$ ; **Supplemental Table 3**), rs2737024 (OR = 1.25, 95% CI = 1.09-1.44, p-  
251 value = 0.002) and rs2583959 (OR = 1.22, 95% CI = 1.06-1.40, p-value = 0.005), were significantly  
252 associated with PD (**Table 1**). These data support a role for variation within the enhancer in conferring  
253 PD risk.

254 To assess how these variants may impact enhancer function and thus PD risk, we assayed differential  
255 protein binding at these variants for >20,000 proteins<sup>40</sup>. In doing so, we identify five proteins whose

256 binding is robustly impacted by these implicated variants: NOVA1, APOBEC3C, PEG10, SNRPA, and  
257 CHMP5 (**Figure 5a, b, c**). Of these, all are expressed at appreciable levels in both MB and FB DA neurons  
258 (**Figure 5d**), excluding APOBEC3C (RPKM  $\leq 1$ ). Of the remaining four proteins, three (PEG10, SNRPA, and  
259 CHMP5) demonstrate an increased binding affinity for the minor risk allele over the major allele; this  
260 direction of effect is consistent with the over-expression paradigm by which *SNCA* confers PD risk<sup>8</sup>.  
261 Interestingly, CHMP5 is the sole protein we identify whose binding affinity is impacted by variant  
262 rs2583959, and our group has recently implicated one of its family members, CHMP7, in conferring PD  
263 risk<sup>27</sup>, perhaps indicating a role for this family of proteins in PD. Although no single protein stands out,  
264 the increased affinity for the risk alleles of the identified enhancer variants by proteins expressed in DA  
265 neurons is consistent with a potential mechanistic contribution to *SNCA* expression and therefore, PD  
266 risk.

267 Finally, we set out to refine the haplotype structure and understand how this identified variation may be  
268 interacting with other variants at this locus. A panel of common variants had previously been genotyped  
269 across *SNCA* and PD-associated haplotypes were identified<sup>41</sup>. After genotyping our patients and controls  
270 for a subset of this panel of variants in addition to all enhancer-associated variants identified by  
271 sequencing (**Supplemental Table 4**), we identified a single haplotype that was significantly associated  
272 with PD (p-value = 0.003), with a higher observed frequency in PD patients (28.3%) compared to controls  
273 (23.4%; **Table 2**). This haplotype implicates some of the same variants as in Guella *et al.*<sup>41</sup> (rs356220,  
274 rs737029) but also implicates rs356225 and rs356168, and the two enhancer-associated variants.  
275 Collectively, these data identify a catecholaminergic enhancer harbouring common variation that is part  
276 of a larger haplotype associated with PD risk.

## 277 **DISCUSSION**

278 The identification and prioritization of biologically pertinent non-coding variation associated with  
279 disease remains challenging. Recent studies by our and other groups have emphasized the importance  
280 of cellular context in the identification of sequences harbouring biologically pertinent variation and the  
281 genes they regulate. To this end, we used chromatin signatures from *ex vivo* isolated DA neurons to  
282 reveal biologically active sequences that harbour non-coding variation contributing to PD risk. We  
283 generated robust CRE catalogues for both MB and FB DA neurons, confirmed their capacity to act as  
284 enhancers, identified motifs that confer their regulatory potential, and notably, identified two variants  
285 located within a MB-specific enhancer that are associated with an increase in PD risk.

286 In contrast to strategies predicated solely on dissection of post-mortem tissues or on the differentiation  
287 of cultured cells, we leveraged the use of transgenic reporter mice to specifically isolate Th-expressing  
288 neurons from discrete neuroanatomical (FB and MB) domains. While our approach assays a more  
289 refined population of DA neurons than would be achieved via gross dissection, recent single-cell RNA-  
290 seq analyses of these same cells make clear that even within these highly restricted MB and FB  
291 populations there exist two primary cellular phenotypes<sup>27</sup>. The “homogenous” MB and FB populations  
292 each are comprised of an immature neuroblast population and a more mature, domain specific, post-  
293 mitotic population of DA neurons. As such, our CRE catalogues capture the chromatin accessibility from  
294 both of these states. These catalogues are demonstrably biologically relevant for our purposes, but  
295 future studies requiring even greater homogeneity may wish to consider single-cell ATAC-seq to refine  
296 these domains further<sup>42</sup>.

297 In our *in silico* validation of the catalogues, we established them to be enriched for both sequence  
298 constraint and biological relevance in a manner consistent with function and their FB/MB origin.  
299 Furthermore, these sequences are frequently domain appropriate enhancers, with each catalogue  
300 capturing a large fraction (77%) of previously validated MB and FB enhancers. Although an abundance of  
301 regions are shown to direct neuronal expression compared to those annotated as negative or non-  
302 neuronal, it is interesting to note that almost half of the sequences previously documented not to direct  
303 expression *in vivo* are also represented in one or both of our catalogues.

304 Given the frequently dynamic nature of CRE activity, this overlap with negative regions likely results  
305 from temporal differences in these assays. Our data indicates these regions are accessible at E15.5 but  
306 the *lacZ* reporter assays were carried out at E11.5; regions that have been annotated as negative at  
307 E11.5 may be active at later time points and, as such, appear in our catalogues. As we moved from these  
308 unbiased functional comparisons to more highly selected ones, the potential impact of temporal  
309 differences became more pronounced. In mouse transgenic reporter assays, two of five assayed  
310 putative CREs direct detectable expression of *lacZ* in neuronal populations. Consistent with the  
311 temporally dynamic nature of CREs, when these same regions are tested in zebrafish across multiple  
312 developmental time points, we observe four of the five sequences to act as neuronal enhancers.

313 In examining the sequence composition underlying the ATAC-seq peaks, we illuminate powerful  
314 vocabularies for both FB and MB DA neuron transcriptional regulatory control. Machine learning using  
315 gkm-SVM prioritizes four transcription factor families (Rfx, Foxa1/2, Nr4a2, Ascl1/2) as those conveying  
316 significant regulatory potential in the CRE catalogues. Of these, the Rfx family had not previously been

317 implicated in DA neuron biology. Although several of the Rfx family members have been annotated as  
318 having expression in the cerebellum or fetal brain<sup>43</sup>, a role specifically in MB DA neurons has not  
319 previously been appreciated. By contrast, Nr4a2 is canonically associated with MB DA neurons<sup>25,26</sup>, is  
320 highly expressed in this population (139 RPKM), and was prioritized as a TF conferring regulatory  
321 potential in these cells; however, TF footprinting fails to provide evidence supporting its activity. We  
322 postulate that this lack of footprint may reflect the transient DNA binding dynamics of Nr4a2.  
323 Transcription factors with short DNA residence times often fail to reveal footprints, and nuclear  
324 receptors, such as Nr4a2, have markedly transient DNA interactions<sup>44</sup>.

325 Taken collectively, these data establish a robust biological platform in which PD-associated variation can  
326 be evaluated. To this end, an obvious candidate to interrogate was an apparent MB-specific open  
327 chromatin domain within intron 4 of the known PD-associated gene, *SNCA*. We assayed the activity of  
328 this putative CRE in zebrafish and across the life course of mice and found it to be active in key  
329 catecholaminergic structures injured in PD (e.g.: the *substantia nigra* and locus coeruleus), from mid-  
330 gestation until at least P30. Thereafter, the utilization of this enhancer in the brain is diminished and by  
331 late life appears restricted to the brainstem and amygdala. By the time of clinical presentation, PD  
332 patients have already lost a significant proportion ( $\geq 30\%$ ) of their nigral DA neurons<sup>2,45</sup>; the observed  
333 biology of this CRE is consistent with a progressive pathogenic influence acting early in life, rendering  
334 these populations preferentially vulnerable to loss over an extensive period of time.

335 Sequencing this interval in PD cases and controls revealed two common variants (rs2737024 and  
336 rs2583959) therein, individually associated with an increased risk of PD. Testing these variants for their  
337 effect on protein binding, we identify five proteins whose binding is affected, three of which, PEG10,  
338 SNRPA, and CHMP5, display greater affinity for the risk allele. Furthermore, we identify a larger  
339 haplotype containing these variants, also significantly associated with PD risk. While none of the other  
340 SNPs in this haplotype overlap with CREs identified in the DA neuron catalogues, variant rs356168 has  
341 significant functional evidence of its activity and contribution to PD risk<sup>46</sup>. The same DHS correlation  
342 analysis<sup>21,31</sup> that suggests an interaction between the *SNCA* promoter and our identified CRE, also  
343 suggests an interaction between the *SNCA* promoter and the rs356168 variant. Additionally, ChIA-PET  
344 data<sup>31,47</sup> indicates that sequence encompassing this variant may interact with our enhancer, suggesting a  
345 potential co-operative mode of action; a paradigm recently proposed by Gupta and colleagues<sup>48</sup> at the  
346 *EDN1* locus. We propose that the variants within the enhancer, independently or in concert with other

347 variation within the identified haplotype, may act throughout the lifespan to render key populations of  
348 catecholaminergic neurons vulnerable, thus increasing PD risk in individuals harbouring this variation.

349 This work emphasizes the value of biologically informed, cell context-dependent guided searches for the  
350 identification of disease associated and functional non-coding variation. Given the extent of non-coding  
351 GWAS-identified variation, the need for strategies to prioritize variants for functional follow-up is  
352 greater than ever. Here, we generate chromatin accessibility data from purified populations of DA  
353 neurons to generate catalogues of putative CREs. We have demonstrated how these data can be used to  
354 reveal non-coding variation contributing to PD risk; focusing on a single region of open chromatin at the  
355 *SNCA* locus, we uncover PD-associated variation therein and propose a model through which this  
356 sequence can contribute to normal DA neuronal biology and PD risk. There remains a plethora of  
357 information still to be explored in these catalogues, either through further single locus investigations or  
358 through massively parallel assays. For example, our MB DA neuron CRE catalogue overlaps SNPs at 10 of  
359 26 (38%) PD-associated loci<sup>9</sup>, all of which can be investigated further for their mechanisms by which they  
360 impact PD risk. Our work establishes a powerful paradigm, leveraging transgenic model systems to  
361 systematically generate cell type specific chromatin accessibility data and reveal disease-associated  
362 variation, in a manner that can be progressively guided by improved biological understanding.

363

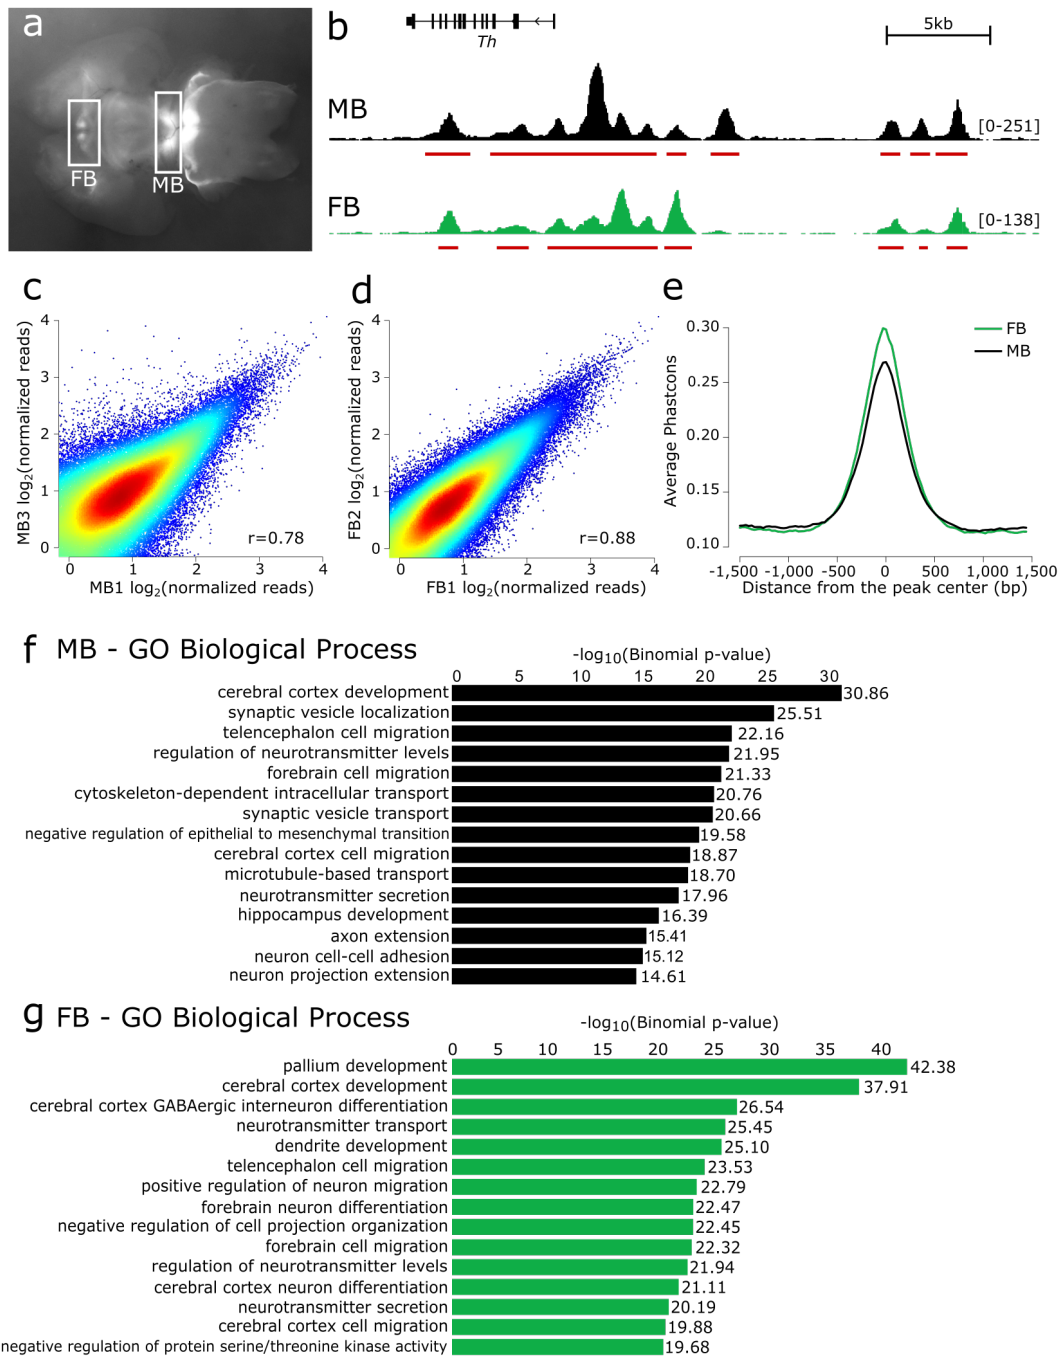

**Figure 1** Preliminary validation of ATAC-seq catalogues generated from *ex vivo* DA neurons. **(a)** The midbrain (MB) and forebrain (FB) of E15.5 brains from Tg(Th-EGFP)DJ76Gsat mice are microdissected, dissociated, and isolated by FACS. **(b)** Read pile-up and called peaks for the MB and FB libraries at the *Th* locus. **(c, d)** Chromatin accessibility, genome-wide, is correlated between replicates. **(e)** The sequences underlying MB and FB peaks display a high degree of evolutionary sequence constraint as measured by PhastCon scores. **(f, g)** Gene ontology terms of the nearest expressed genes to all peaks in both the MB and FB reflect the neuronal origin and function of these catalogues.

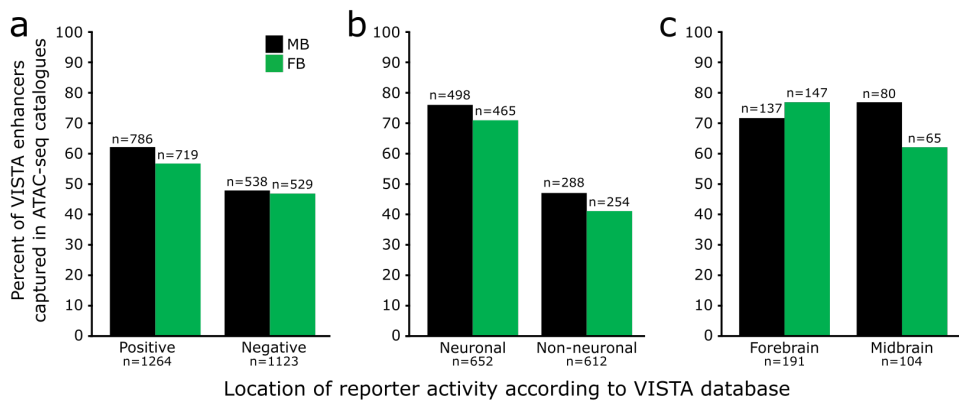

**Figure 2** Validation of the putative CRE catalogues *in vivo*. **(a)** Of the elements annotated in VISTA as having enhancer activity, 62% and 56% of these are represented in the MB and FB catalogues, respectively **(b)** An abundance of open chromatin regions in the MB and FB catalogues overlap confirmed neuronal enhancers ( $\geq 70\%$ ). **(c)** Stratifying neuronal enhancers, MB- and FB-specific enhancers are enriched in our MB and FB catalogues, respectively. **(d-h)** Testing five prioritized putative CREs *in vivo* identifies five neuronal enhancers. **(d)** A putative CRE in intron 1 of *KCNQ3* directs expression in the midbrain, hindbrain, and neural tube of E11.5 lacZ reporter mice. It fails to direct expression in a transgenic zebrafish assay at either 3 or 5 days post fertilization (dpf); reporter expression present in  $\leq 25\%$  of mosaics. **(e, f, g)** Putative CREs downstream of *FOXP1*, upstream of *NR4A2*, and in an intron of *CRHR1* fail to direct expression in transgenic mice, however, they direct robust neuronal appropriate expression in transgenic zebrafish reporter assays (scored for expression in MB, FB, amacrine cells (AC), hindbrain (HB), spinal cord (SC)). **(h)** A putative CRE downstream of *FOXA2* directs neuronal expression in both transgenic mice and zebrafish assays. N mosaic zebrafish scored:  $\geq 141$  for 3dpf,  $\geq 119$  for 5dpf. All constructs have since been deposited in the VISTA database, under the hs numbers supplied.

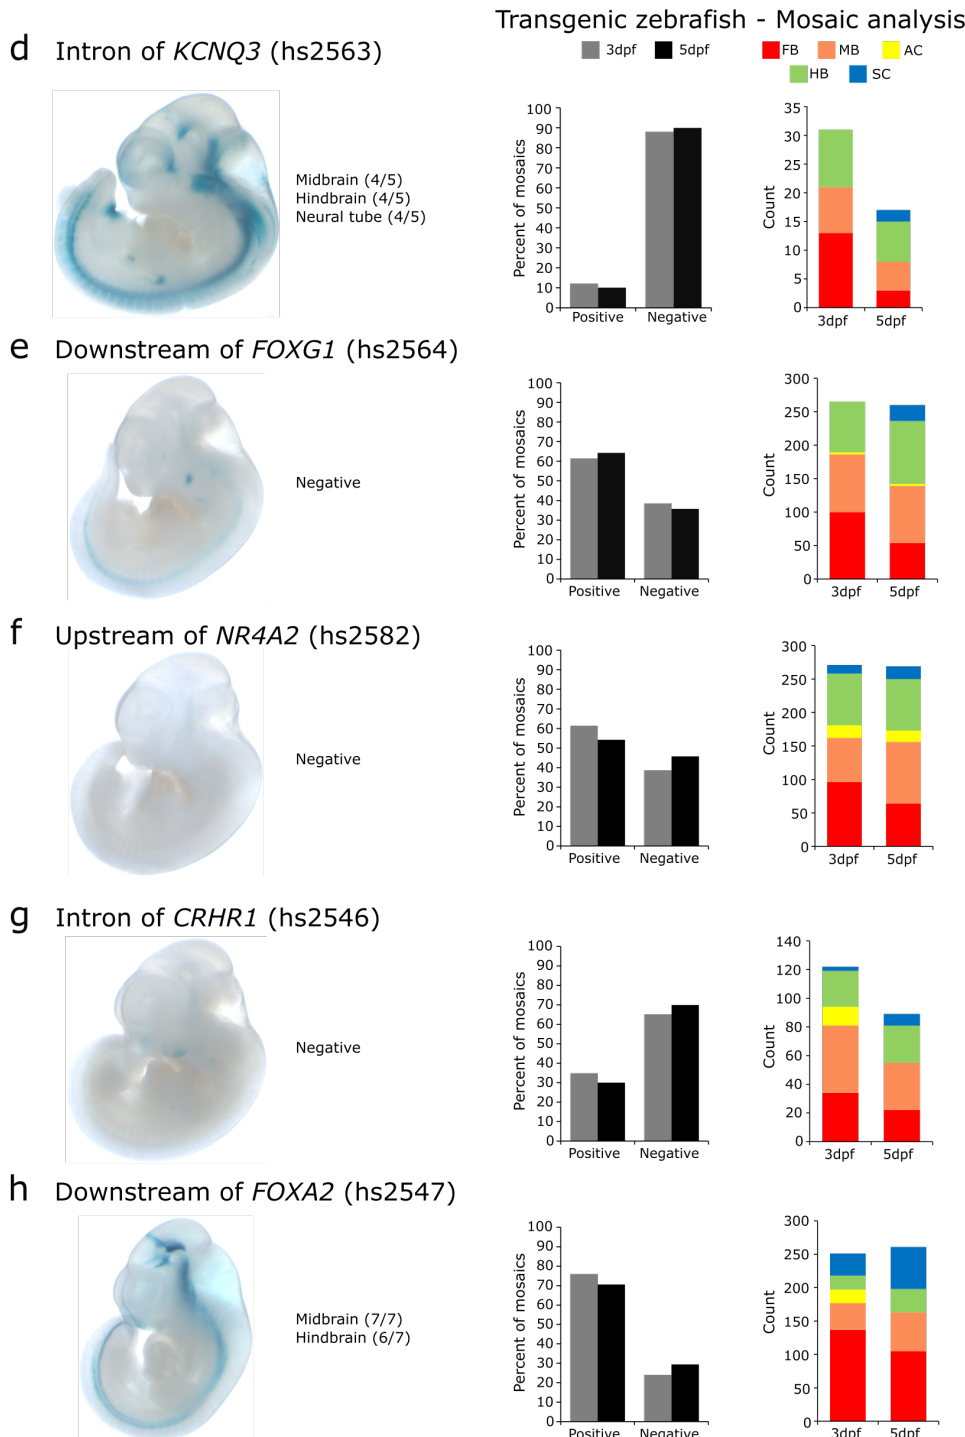

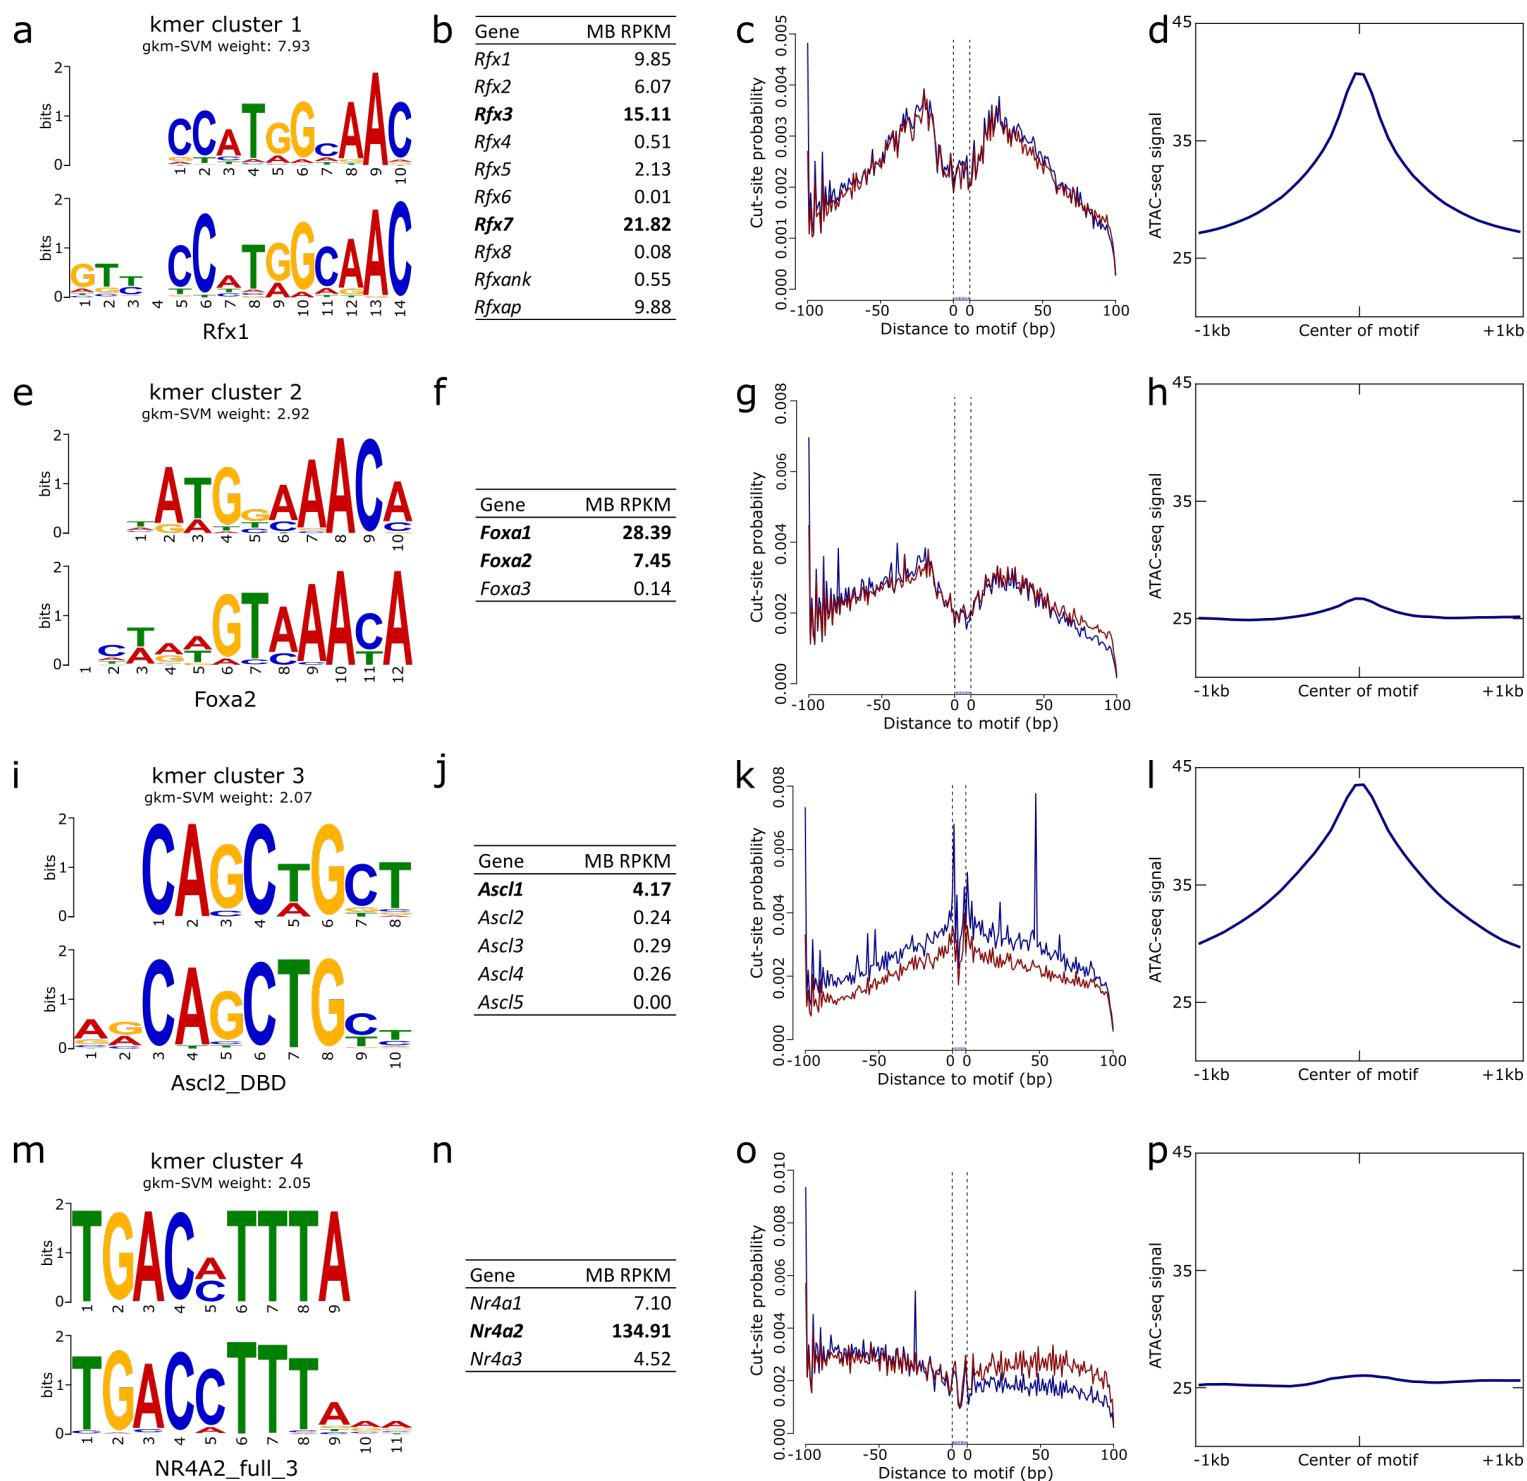

**Figure 3** Identification of transcription factors (TFs) important to DA neurons. **(a)** The kmer predicted to have the greatest regulatory potential underlying MB ATAC-seq peaks corresponds to the Rfx family of TFs. **(b)** RNA-seq quantification in these same cells indicates this enrichment is likely due to Rfx3 or Rfx7 activity. Examining the ATAC-seq signal over predicted binding sites reveals a robust TF footprint **(c)** and a general enrichment of reads overlapping Rfx sites genome-wide **(d)**. **(e-h)** Similarly, a kmer corresponding to the TFs Foxa1/2 have similar evidence for their activity. **(i-j)** The third ranked motif likely corresponds to Ascl1, and while it fails to leave a robust TF footprint **(k)**, there is clear enrichment of ATAC-seq signal overlapping genome-wide predicted Ascl1 binding sites **(l)**. **(m-n)** Nr4a2, canonically associated with DA neuron biology, is identified as a highly expressed TF likely contributing to the regulatory potential of the putative CREs however, it fails to leave a TF footprint in the cut-site patterns around predicted motif sites **(o)** and is only mildly enriched for ATAC-seq reads over its predicted binding sites **(p)**.



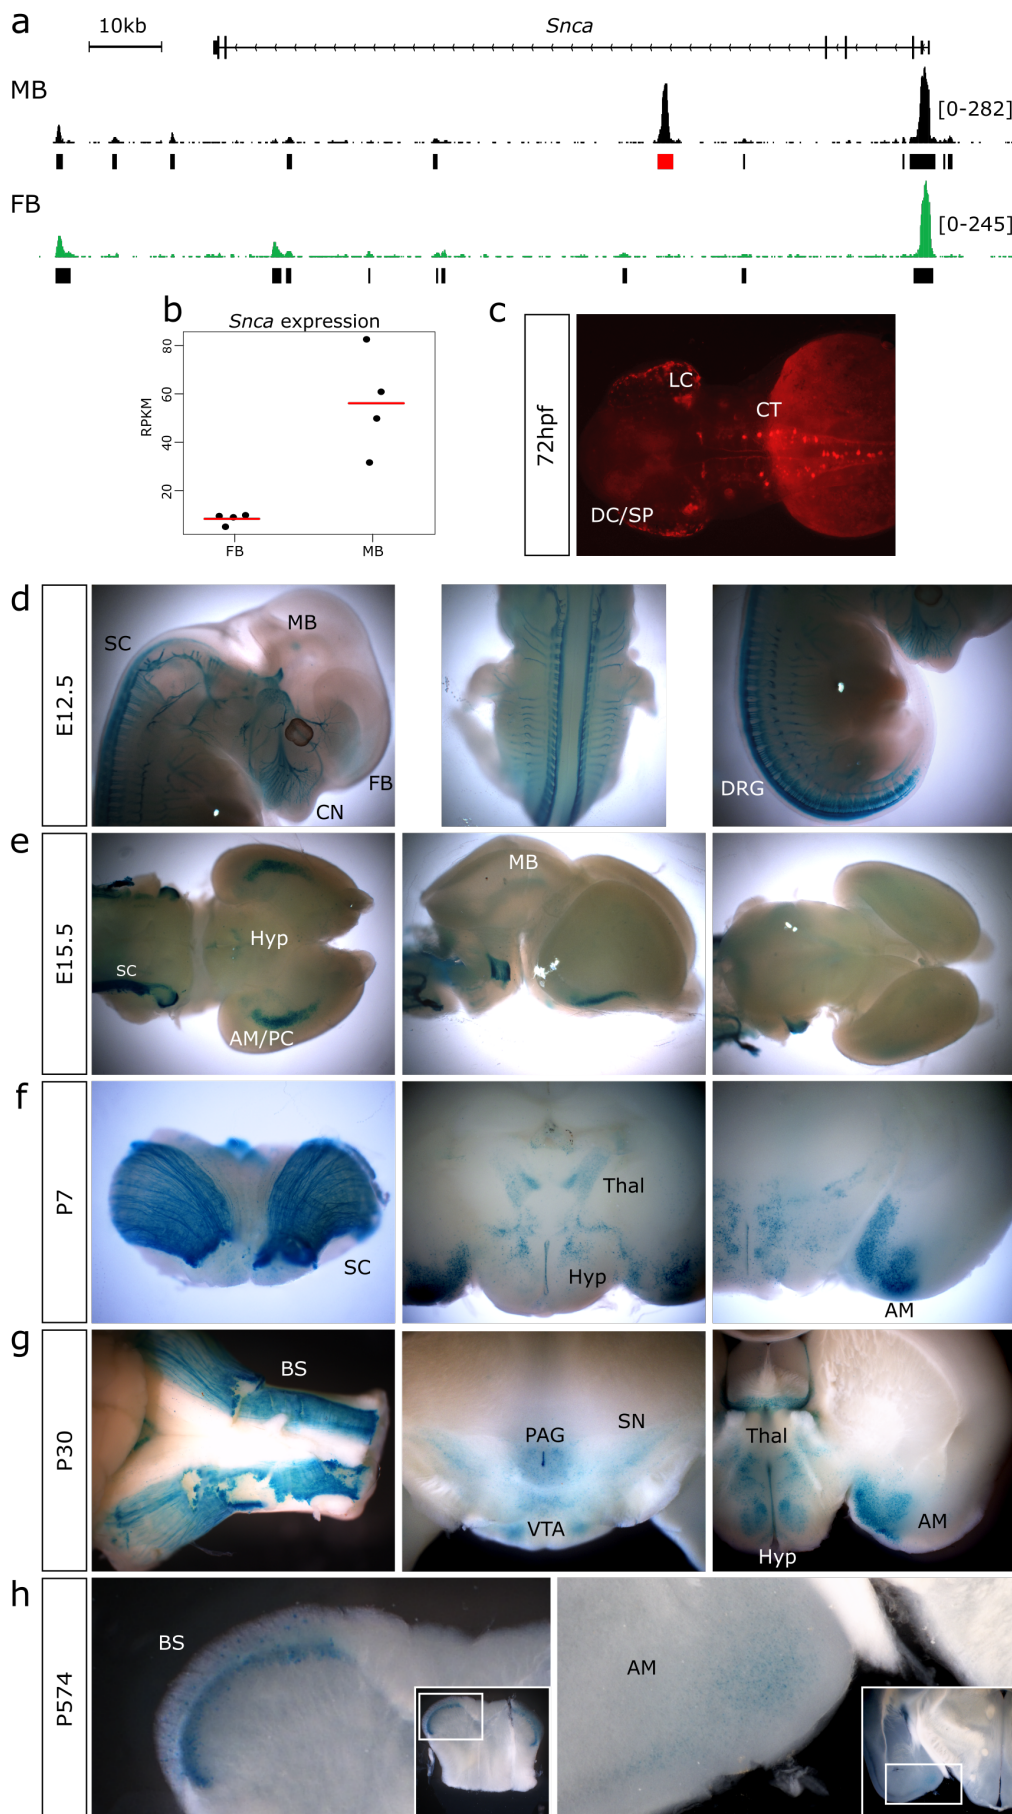

**Figure 4** A MB-specific enhancer directs expression in catecholaminergic populations of neurons known to Parkinson disease biology. **(a)** IGV track indicating the location of the MB-specific region of open chromatin, located in intron 4 of *Snca*. **(b)** *Snca* is differentially expressed between the MB and FB DA neurons. Red bar is the mean expression of the four replicates (black dots). **(c)** At 72 hours post fertilization (hpf), stable transgenic zebrafish reporter assays indicate this putative CRE is capable of directing reporter expression in key catecholaminergic neuronal populations, including the locus coeruleus (LC), the catecholaminergic tract (CT) of the hindbrain, and the diencephalic cluster (DC) with projections to the subpallium (SP). **(d-g)** Further studies in *lacZ* reporter assays in embryonic (E) and post-natal (P) mice indicate dynamic enhancer usage across developmental time. **(d)** This enhancer directs expression throughout the MB, FB, dorsal root ganglia (DRG), sympathetic chain (SC), and cranial nerves (CN) of E12.5 mice. **(e)** By E15.5, reporter expression is observed in the amygdala and/or piriform cortex (AM/PC), sympathetic chain, MB, and hypothalamus (Hyp). **(f)** Patterns of reporter expression at P7 reflect those seen at E15.5. **(g)** Reporter activity is observed at P30 in the amygdala, hypothalamus and thalamus (Thal), brain stem (BS), *substantia nigra* (SN), ventral tegmental area (VTA), and the periaqueductal grey area (PAG). **(h)** In aged mice (P574), reporter expression is detected robustly in the brain stem and faintly in the amygdala.

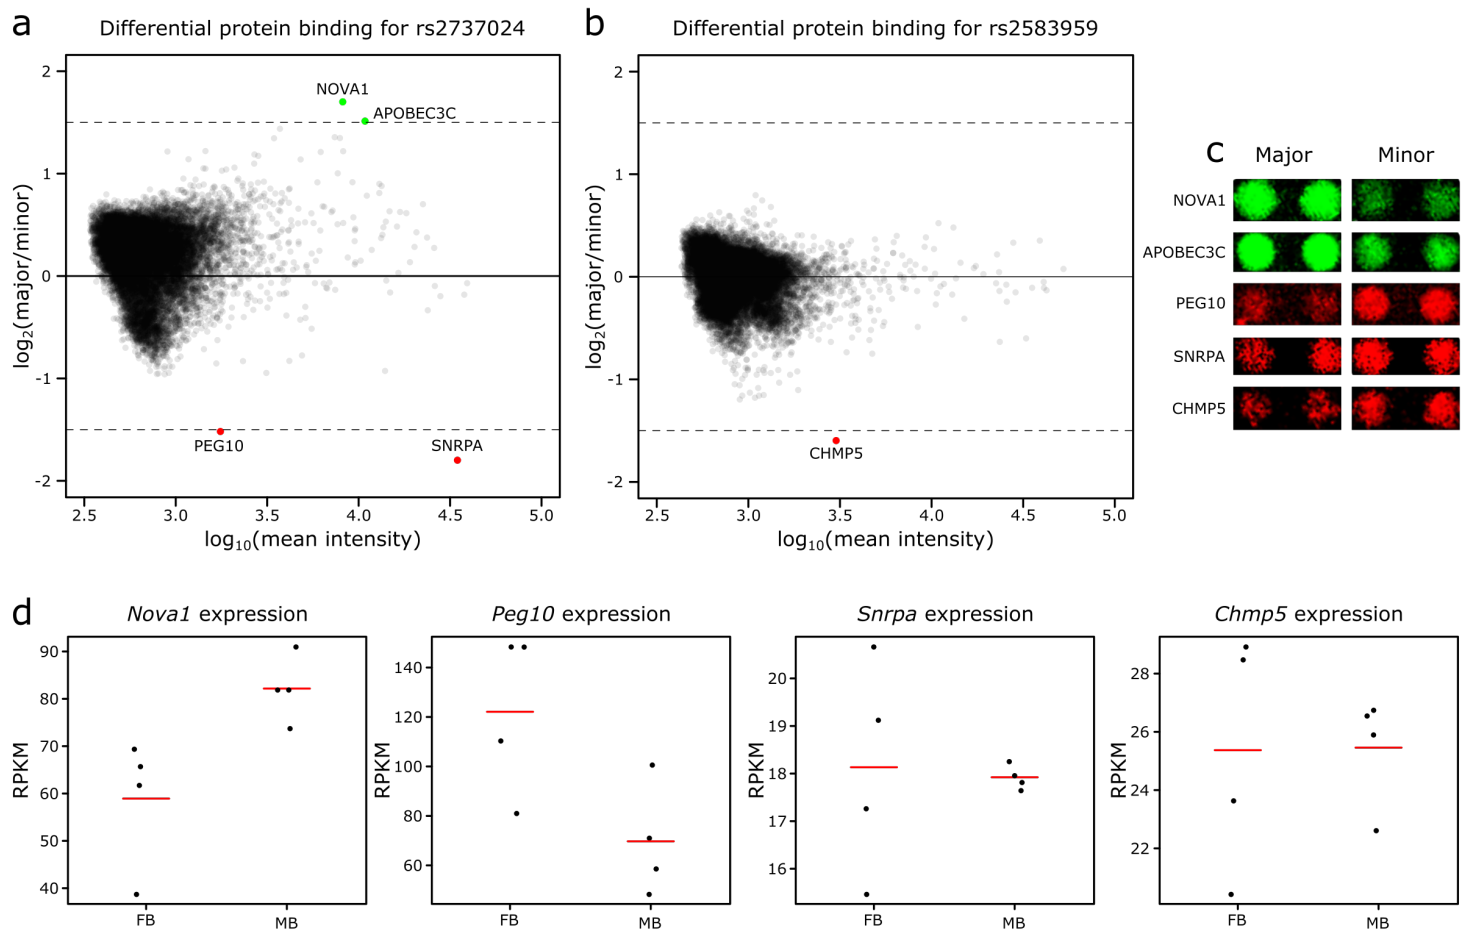

**Figure 5** Identification of proteins whose binding is impacted by the implicated PD-risk SNPs. **(a, b)** MA plots for both rs2737024 and rs2583959 indicating the magnitude of the effect of the minor and major allele on binding. Cut-off for differential binding:  $\log_2(\text{major}/\text{minor}) \geq 1.5$  or  $\leq -1.5$ . **(a)** NOVA1 and APOBEC3C (green circles) bind at rs2737024 with greater affinity for the major allele, while PEG10 and SNRPA (red circles) have a greater affinity for the minor allele. **(b)** CHMP5 (red circle) has a greater affinity for the minor allele of rs2583959. **(c)** Representative images of the protein binding for each of the differentially bound proteins. **(d)** Expression analysis in the MB and FB DA neurons for each of the differentially bound proteins indicate *Nova1*, *Peg10*, *Snrpa*, and *Chmp5* to be highly expressed in these populations, while none of the *Apoec* family member genes are expressed (RPKM  $\leq 1$ , data not shown). Red bar is the mean expression of the four replicates (black dots).

**Table 1:** Two tightly linked SNPs within the enhancer are significantly associated with PD risk

| Variant    | MA | MAF in PD cases<br>(N=986) | MAF in controls<br>(N=992) | Association with PD |         |
|------------|----|----------------------------|----------------------------|---------------------|---------|
|            |    |                            |                            | OR (95% CI)         | p-value |
| rs7684892  | A  | 0.069                      | 0.065                      | 0.93 (0.72-1.20)    | 0.562   |
| rs17016188 | C  | 0.082                      | 0.061                      | 1.35 (1.04-1.75)    | 0.023   |
| rs2583959  | G  | 0.317                      | 0.271                      | 1.22 (1.06-1.40)    | 0.005 * |
| rs2737024  | G  | 0.319                      | 0.270                      | 1.25 (1.09-1.44)    | 0.002 * |

MA=minor allele; MAF=minor allele frequency; OR=odds ratio; CI=confidence interval  
 Only variants with MAF > 0.05 were considered  
 ORs, 95% CIs, and p-values result from additive logistic regression models adjusted for age at blood draw and sex  
 p-values ≤ 0.0125 were considered as statistically significant after applying a Bonferroni correction for multiple testing (\*)

**Table 2:** A single haplotype, containing the minor alleles of the implicated SNPs, is significantly associated with PD risk

|                                           |    | rs356220 | rs356225 | rs3857057 | rs356168 | rs10018362 | rs2737029 | rs62306323 | rs2737024 | rs2583959 | rs17016188 | rs7684892 | rs7689942 | Frequency<br>in PD cases | Frequency<br>in controls | p-value |
|-------------------------------------------|----|----------|----------|-----------|----------|------------|-----------|------------|-----------|-----------|------------|-----------|-----------|--------------------------|--------------------------|---------|
|                                           |    |          |          |           |          |            |           |            |           |           |            |           |           |                          |                          |         |
| Haplotypes spanning the <i>SNCA</i> locus | 1  | C        | C        | A         | G        | T          | T         | C          | A         | C         | T          | G         | C         | 0.015                    | 0.027                    | 0.012   |
|                                           | 2  | C        | G        | A         | A        | T          | T         | T          | A         | C         | T          | G         | C         | 0.092                    | 0.110                    | 0.029   |
|                                           | 3  | C        | C        | A         | G        | C          | C         | C          | A         | C         | T          | A         | T         | 0.039                    | 0.048                    | 0.184   |
|                                           | 4  | T        | C        | A         | G        | T          | T         | C          | A         | C         | T          | G         | C         | 0.037                    | 0.040                    | 0.480   |
|                                           | 5  | C        | G        | A         | A        | T          | T         | C          | A         | C         | T          | G         | C         | 0.380                    | 0.397                    | 0.593   |
|                                           | 6  | T        | C        | A         | G        | T          | T         | T          | A         | C         | T          | G         | C         | 0.010                    | 0.011                    | 0.698   |
|                                           | 7  | C        | G        | A         | A        | T          | C         | C          | G         | G         | T          | G         | C         | 0.009                    | 0.012                    | 0.944   |
|                                           | 8  | C        | C        | A         | G        | T          | C         | C          | G         | G         | T          | G         | C         | 0.016                    | 0.015                    | 0.768   |
|                                           | 9  | T        | C        | G         | G        | C          | C         | C          | A         | C         | T          | A         | T         | 0.021                    | 0.017                    | 0.360   |
|                                           | 10 | T        | C        | G         | G        | T          | C         | C          | A         | C         | C          | G         | C         | 0.014                    | 0.009                    | 0.189   |
|                                           | 11 | T        | C        | G         | G        | C          | C         | C          | A         | C         | C          | G         | C         | 0.057                    | 0.044                    | 0.124   |
|                                           | 12 | T        | C        | A         | G        | T          | C         | C          | G         | G         | T          | G         | C         | 0.283                    | 0.234                    | 0.003 * |

Only haplotypes with frequency ≥ 0.01 were considered  
 Black boxes indicate the minor allele in Europeans  
 p-values result from score tests for association, performed under an additive model, adjusted for age at blood draw and sex  
 p-values ≤ 0.0042 were considered as statistically significant after applying a Bonferroni correction for multiple testing (\*)

## 366 **METHODS**

### 367 **Animal husbandry**

368 Tg(Th-EGFP)DJ76Gsat mice (Th-EGFP) were generated by the GENSAT Project and purchased through  
369 the Mutant Mouse Resource and Research Centers Repository. Colony maintenance matings were  
370 between hemizygous male Th-EGFP mice and female Swiss Webster (SW) mice, obtained from Charles  
371 River Laboratories. This same mating scheme was used to establish timed matings, generating litters for  
372 assay; day on which vaginal plug is observed, E0.5. Adult AB zebrafish lines were maintained in system  
373 water according to standard methods<sup>49</sup>. All work involving mice and zebrafish (husbandry, colony  
374 maintenance, procedures, and euthanasia) were reviewed and pre-approved by the institutional care  
375 and use committee.

### 376 **Neural dissociation and FACS**

377 Pregnant SW mice were euthanized at E15.5 and the embryos were removed and immediately placed in  
378 chilled Eagle's Minimum Essential Media (EMEM) on ice. Embryos were decapitated and brains were  
379 removed into Hank's Balanced Salt Solution without Mg<sup>2+</sup> and Ca<sup>2+</sup> (HBSS w/o) on ice. Under a  
380 fluorescent microscope, EGFP+ brains were identified and microdissected to yield the desired forebrain  
381 (FB) and midbrain (MB) regions desired. Microdissected regions were placed in fresh HBSS w/o on ice,  
382 and pooled per litter for dissociation.

383 Pooled brain regions were dissociated using the Papain Dissociation System (Worthington Biochemical  
384 Corporation). The tissue was dissociated in the papain solution for 30 minutes at 37°C, with gentle  
385 trituration every 10 minutes using a sterile Pasteur pipette. Following dissociation, cells were passed  
386 through a 40µm cell strainer into a 50mL conical, centrifuged for 5 minutes at 300g, resuspended in  
387 albumin-inhibitor solution containing DNase, applied to a discontinuous density gradient, and  
388 centrifuged for 6 minutes at 70g. The resulting cell pellet was resuspended in HBSS with Mg<sup>2+</sup> and Ca<sup>2+</sup>  
389 and submitted to FACS. Aliquots of 50,000 EGFP+ cells were sorted directly into 300µL HBSS with Mg<sup>2+</sup>  
390 and Ca<sup>2+</sup> with 10% FBS for ATAC-seq. Aliquots containing ≥50,000 EGFP+ cells were sorted into kit-  
391 provided lysis buffer for RNA-seq. This procedure was repeated such that a single aliquot of cells from  
392 each region per litter were submitted to either ATAC-seq or bulk RNA-seq three times over for each  
393 region.

### 394 **ATAC-seq library preparation and quantification**

395 ATAC-seq library preparation generally follows the steps as set out in the original ATAC-seq paper<sup>17</sup> with  
396 minor modifications. Aliquots of 50,000 EGFP+ cells were centrifuged for 5 minutes at 4°C and 500g,  
397 washed with 50µL of chilled PBS and centrifuged again for 5 minutes at 4°C and 500g. The cell pellet was  
398 resuspended in lysis buffer, as set out in the protocol, and cells were left to lyse for 5 minutes at 4°C  
399 before being centrifuged for 10 minutes at 4°C at 500g. The resulting nuclei pellet was transposed, as  
400 written, using the transposase from the Nextera DNA Library Preparation Kit. Following transposition,  
401 DNA was purified with the MinElute Reaction Clean-up Kit (Qiagen) and eluted in 10µL elution buffer.  
402 Libraries were amplified according to the original ATAC-seq protocol<sup>17</sup>. The qPCR surveillance steps were  
403 modified such that the additional number of cycles of amplification were calculated as ¼ maximum  
404 intensity, so as to limit PCR duplication rates in the final libraries. Amplified libraries were purified with  
405 Ampure XP beads (Beckman Coulter) following the Nextera DNA Library Prep Protocol Guide. Libraries  
406 were quantified using the Qubit dsDNA High Sensitivity Assay (Invitrogen) in combination with the  
407 Agilent 2100 Bioanalyzer using the High Sensitivity DNA Assay (Agilent).

#### 408 **ATAC-seq sequencing, alignment, and peak calling**

409 Individual ATAC-seq libraries were sequenced on the Illumina MiSeq to a minimum depth of 20 million,  
410 2x75bp reads per library. A single MB ATAC-seq library was sequenced on the Illumina HiSeq in Rapid  
411 Run mode with 2x100bp reads, to a depth of ≥350 million paired-end reads.

412 Quality of sequencing was evaluated using FastQC (v0.11.2;  
413 <https://www.bioinformatics.babraham.ac.uk/projects/fastqc/>). Reads were aligned to mm9 using  
414 Bowtie2<sup>50</sup> (v2.2.5), under --local mode. Reads aligning to the mitochondrial genome, unknown and  
415 random chromosomes, and PCR duplicates were removed prior to peak calling (SAMtools<sup>51</sup>). Peaks were  
416 called on individual libraries and on a concatenated file combining all MB and all FB libraries (“Joint”)  
417 using MACS2<sup>52</sup> (v2.1.1.20160309) “callpeak” with options: --nomodel --nolambda -B -f BAMPE --gsize  
418 mm --keep-dup all. Peaks overlapping blacklisted regions called by ENCODE and in the original ATAC-seq  
419 paper were removed<sup>17,47</sup>.

#### 420 **RNA-seq library preparation and quantification**

421 Total RNA was extracted using the Purelink RNA Micro Kit (Invitrogen). Following FACS isolation into kit-  
422 provided lysis buffer, samples were homogenized and RNA extraction proceeded using manufacturer’s  
423 recommendations. Total RNA integrity was determined using the RNA Pico Kit (Agilent). RNA samples

424 were sent to the Sidney Kimmel Comprehensive Cancer Center Next Generation Sequencing Core at  
425 Johns Hopkins for library preparation, using the Ovation RNA-Seq System V2 (Nugen), and sequencing.

#### 426 **RNA-seq sequencing, alignment, and transcript quantification**

427 Libraries were pooled and sequenced on Illumina's HiSeq 2500 in Rapid Run mode with 2x100bp reads  
428 to an average depth of >90 million reads per library. Quality of sequencing was evaluated using FastQC.  
429 FASTQ files were aligned to mm9 using HISAT2<sup>53</sup> (v2.0.1-beta) with --dta specified.

430 Aligned reads from individual samples were quantified against a reference transcriptome using the  
431 Rsubread package<sup>54-56</sup> (v1.22.3) function "featureCounts" with the following options: isPairedEnd =  
432 TRUE, requireBothEndsMapped = TRUE, isGTFAnnotationFile = TRUE, useMetaFeature = TRUE. The  
433 GENCODE vM9 GTF was downloaded<sup>57</sup> (date: March 30, 2016) and lifted over from the mm10 to the  
434 mm9 genome using CrossMap (v0.2.2) with default parameters<sup>58</sup>. This was used for quantification, in  
435 which gene-level raw counts were converted to RPKM values and means for each region were  
436 calculated.

#### 437 **cDNA synthesis and RT-qPCR for DA neuron markers**

438 RNA was extracted using the RNeasy Mini Kit (Qiagen), after sorting 50,000 cells directly into Buffer RLT.  
439 Aliquots of 50,000 non-fluorescing cells were also collected and processed in parallel. 100ng of each  
440 RNA sample was submitted to first strand cDNA synthesis using the SuperScript III First-Strand Synthesis  
441 System for RT-PCR (Invitrogen), following the Oligo(dT) method.

442 Primers (**Supplementary Table 5**) were designed using Primer-BLAST<sup>59</sup> under default parameters with  
443 the requirement for exon-exon junction spanning specified. qPCR was performed using Power SYBR  
444 Green Master Mix (Applied Biosystems). Reactions were run in triplicate, following default SYBR Green  
445 Standard cycle specifications on the Viia7 Real-Time PCR System (Applied Biosystems). Relative  
446 quantification followed the  $2^{-\Delta\Delta CT}$  method, normalizing results to *Actb* in the EGFP- aliquot of cells for  
447 each region, respectively.

#### 448 **Correlation analysis between regions and within replicates**

449 Peaks from all six ATAC-seq libraries and the two "Joint" ATAC-seq libraries were concatenated together,  
450 sorted on the basis of chromosomal location, merged into a unified peak set<sup>60</sup>, and converted to  
451 Simplified Annotation Format (SAF). Reads from each BAM file overlapping this unified peak set were  
452 quantified with the Rsubread package "featureCounts" command, with the following options:

453 isPairedEnd = TRUE, requireBothEndsMapped = FALSE. Read counts were normalized for each library  
454 using conditional quantile normalization<sup>61</sup>, accounting for library size, peak length, and peak GC content.  
455 Pearson correlation co-efficients were calculated from this normalized count matrix and visualized using  
456 `corrplot`<sup>62</sup> and `RColorBrewer`<sup>63</sup> and `LSD`<sup>64</sup>.

#### 457 **Sequence constraint analysis**

458 Average `phastCons`<sup>65</sup> were calculated for the “Joint” peak file for both the MB and FB libraries using  
459 `Cistrome`<sup>66</sup> (<http://cistrome.org/ap/>). Beforehand, peaks with overlap of exons or promoters (defined  
460 here as +/-2000bp from the transcriptional start site) were removed. The exon and promoter BED files  
461 were downloaded from the UCSC table browser<sup>67</sup> (Mouse genome; mm9 assembly; Genes and Gene  
462 Predictions; RefSeq Genes track using the table `refGene`).

#### 463 **Gene ontology of nearest expressed gene**

464 The Genomic Regions Enrichment of Annotations Tool<sup>68</sup> (GREAT; v3.0.0; <http://great.stanford.edu>)  
465 predicted the GO term enrichment in the catalogues. Beforehand, peaks were processed to: a) remove  
466 peaks overlapping commonly open regions; b) select the top 20,000 peaks and; c) overlap the nearest  
467 expressed gene’s transcriptional start site (TSS).

468 First, regions that are commonly open were defined as those regions of the genome that are open in  
469 >30% of ENCODE DNase hypersensitivity site (DHS) assays in mouse tissues. These ubiquitously open  
470 regions were removed from the peak files. Next, to limit the number of regions submitted to GREAT  
471 such that the binomial distribution for calculating fold enrichment values was still valid, peak files were  
472 limited to the top 20,000 peaks on the basis of q-value.

473 Finally, in order to limit ourselves to the nearest expressed gene, we supplied a list of the TSSs of the  
474 nearest expressed gene that are in the GREAT database. The list of genes and their TSSs used by GREAT  
475 was downloaded from:

476 <http://bejerano.stanford.edu/help/download/attachments/2752609/mm9.great3.0.genes.txt>. Only  
477 genes that are in this list with RPKM > 1 were considered as expressed. The nearest expressed gene to  
478 each of the top 20,000 peaks was identified. Each peak is associated with its nearest expressed gene and  
479 to ensure that GREAT only considered these nearest genes for analysis, we submitted these nearest  
480 expressed gene’s TSSs as a proxy for each peak. These proxy peaks were submitted to GREAT using the  
481 NCBI build 37 (mm9) assembly, under whole genome background regions, with the single nearest gene  
482 as the association rule, including curated regulatory domains.

## 483 **Quantification of overlap between CRE catalogues and the VISTA Enhancer Browser**

484 All elements tested *in vivo* were downloaded from the VISTA Enhancer Browser  
485 (<https://enhancer.lbl.gov>) on September 4, 2016. These regions were stratified into those annotated as  
486 positive or negative. BED co-ordinates of these regions were extracted and intersected with the ATAC-  
487 seq catalogues. Positive regions were further stratified into those with annotations for only forebrain,  
488 only midbrain, only hindbrain, combinations of regions (“Multiple regions”), all three regions (“Whole  
489 brain”), summing to the “Neuronal” category, or were annotated as positive but driving expression in  
490 none of those three regions (“Non-neuronal”).

## 491 **Testing five putative CREs for *in vivo* reporter activity**

492 Prioritized regions were PCR amplified (**Supplementary Table 5**) from human gDNA and cloned into  
493 either pENTR for mouse *lacZ* assays (Invitrogen) or pDONR221 for zebrafish assays (Invitrogen). Regions  
494 were sequence validated and LR cloned (Invitrogen) into either an *hsp68-lacZ* vector or pXIG vector, with  
495 a TdTomato cassette in place of GFP.

496 Generation of transgenic mice and E11.5 embryo staining was performed as previously described<sup>69–71</sup>  
497 using FVB strain mice. Embryos expressing the *lacZ* reporter gene were scored and annotated for their  
498 expression patterns by multiple curators. For a construct to be considered positive, a minimum of three  
499 embryos per construct were required to demonstrate reporter activity in the same tissue. Mouse  
500 transient transgenic assays were approved by the Lawrence Berkeley National Laboratory Animal  
501 Welfare and Research Committee.

502 Generation of transgenic zebrafish was performed as previously described<sup>72</sup> in AB zebrafish. At 3dpf and  
503 5dpf, reporter expression patterns were evaluated. For a construct to be considered as positive, ≥25% of  
504 mosaic embryos had to display reporter activity in one or more anatomical structures. Positive zebrafish  
505 were quantified for reporter activity in five anatomical regions (forebrain, midbrain, hindbrain, amacrine  
506 cells, spinal cord).

## 507 **Regulatory vocabulary development**

508 We applied the machine learning algorithm gkm-SVM to our MB and FB catalogues, under default  
509 settings. We trained on the sequences underlying the summits ±250bp of non-ubiquitously open, top  
510 10,000 peaks by signal intensity, versus five negative sets, matched for GC content, length, and repeat  
511 content. Weights across all five tests were averaged for all 10-mers.



512 All 10-mers with weight  $\geq 1.50$  were clustered on sequence similarity using Starcode<sup>73</sup>, using sphere  
513 clustering with distance set to 3. clustalOmega<sup>74</sup> aligned the sequences within these clusters and  
514 MEME<sup>75</sup>, under default parameters, excepting -dna -maxw 12, generated position weight matrices of  
515 these aligned clusters. Tomtom<sup>76</sup>, querying the Jolma 2013, JASPAR Core 2014, and Uniprobe mouse  
516 databases, identified the top transcription factors corresponding to these position weight matrices,  
517 under default parameters excepting -no-ssc -min-overlap 5 -evaluate -thresh 10.0.

518 The same procedure was used to identify transcription factors specifically conveying regulatory potential  
519 in the MB library relative to the FB library, except during gkm-SVM training, the positive set was  
520 specified as the top 10,000 non-ubiquitously open MB summits and the negative set was specified to be  
521 the top 10,000 non-ubiquitously open FB summits, both  $\pm 250$ bp.

### 522 **Transcription factor footprinting**

523 CENTIPEDE<sup>77</sup> was used to identify footprints. Sequences underlying the deeply sequenced MB library  
524 peaks, less those ubiquitously open, were extracted. FIMO<sup>78</sup>, with options --text --parse-genomic-coord,  
525 identified all locations underlying ATAC-seq peaks of the motifs identified above. Additionally,  
526 conservation data from 30-way vertebrate phastCons was considered in the CENTIPEDE calculations; for  
527 each PWM site, those with mean conservation score greater than 0.9 were considered. Finally, the BAM  
528 file read end co-ordinates were adjusted in response to the shift in co-ordinates due to the transposase  
529 insertion<sup>79</sup>. As such, following the original ATAC-seq method<sup>17</sup>, reads were adjusted +4bp on the positive  
530 strand and -5bp on the negative strand.

### 531 **Genome-wide read pileup over predicted motif sites**

532 FIMO, as above, was used to identify all co-ordinates genome wide of the identified motifs. deepTools<sup>80</sup>  
533 “bamCoverage” tool was run under default conditions, to convert the deeply sequenced MB library BAM  
534 to bigwig format. Following this, a matrix file was generated with “computeMatrix”, with options --  
535 referencePoint center -b 1000 -a 1000 -bs 50 specified. Finally, “plotHeatmap” was used to generate  
536 plots indicating ATAC-seq read pileup over predicted motif sites.

### 537 ***In vivo* validation of the MB-specific enhancer**

538 The MB-specific peak was PCR amplified (**Supplementary Table 5**) from human genomic DNA and TA  
539 cloned into pCR8 (Invitrogen). Regions were sequence validated and LR cloned (Invitrogen) into either  
540 an *hsp68-lacZ* vector or a modified pXIG vector, with a TdTomato cassette in place of GFP.

541 For zebrafish transgenesis, the modified pXIG vector was injected into 1-2 cell stage embryos as  
542 previously described<sup>72</sup> in AB zebrafish. TdTomato reporter expression was assayed at 72hpf and 5dpf;  
543 mosaic embryos positive for TdTomato expression were selected and raised to adulthood and founders  
544 were identified. Progeny of founders were screened at 72hpf for reporter activity.

545 For mouse transgenesis, the generated *hsp68-lacZ* vector was purified in a double CsCl gradient  
546 (Lofstrand Labs Ltd) and stable mouse transgenesis was performed in C57BL/6 mice by Cyagen  
547 Biosciences Inc. Multiple founder lines were generated. For lacZ staining, embryos were collected at  
548 E12.5, and mouse brains were isolated at E15.5, P7, P30, and P574. Brains were roughly sectioned in  
549 1mm sections at P7 and P30 and animals were perfused at P574 and fixed brains were sectioned  
550 (200 $\mu$ m) with a vibratome. Specimens were subsequently fixed for 2 hours on ice in 1% formaldehyde,  
551 0.2% glutaraldehyde, 0.02% Igepal CA-630 in PBS. Following fixation, tissues were permeabilized over  
552 3x15 minute washes in 2mM MgCl<sub>2</sub> and 0.02% Igepal CA-630 in PBS at room temperature.  
553 Embryos/tissues were incubated overnight at 37°C in staining solution, containing 320 $\mu$ g/mL X-Gal in  
554 N,N-dimethyl formamide, 12mM K-ferricyanide, 12mM K-ferrocyanide, 0.002% Igepal CA-630, 4mM  
555 MgCl<sub>2</sub> in PBS. Specimens were washed in 0.2% Igepal CA-630 in PBS over 2x30 minutes and finally stored  
556 in 4% formaldehyde, 100mM sodium phosphate, and 10% methanol.

#### 557 **Patient sequencing and genotyping at *SNCA***

558 A total of 986 PD patients and 992 controls who were seen at the Mayo Clinic in Jacksonville, FL were  
559 sequenced across the putative enhancer and genotyped for 25 variants across the *SNCA* locus. The  
560 variants chosen for genotyping were confirming those identified by sequencing of the enhancer as well  
561 as assessing those identified in Guella *et al*<sup>41</sup>. For PD patients, median age at blood draw was 69 years  
562 (Range: 28-97 years), median age at PD onset was 67 years (Range: 28-97 years), and 631 patients  
563 (64.0%) were male. Median age at blood draw in controls was 67 years (Range: 18-92 years) and 415  
564 subjects (41.8%) were male. Patients were diagnosed with PD using standard clinical criteria<sup>81</sup>. All  
565 subjects are unrelated non-Hispanic Caucasians of European descent. The Mayo Clinic Institutional  
566 Review Board approved the study and all subjects provided written informed consent.

567 Genomic DNA was extracted from whole blood using the Autogen FlexStar. Sanger sequencing of the  
568 enhancer region was performed bidirectionally using the ABI 3730xl DNA analyzer (Applied Biosystems)  
569 standard protocol. Sequence data was analyzed using SeqScape v2.5 (Applied Biosystems). Statistical  
570 analyses were performed using both SAS and R<sup>82</sup>. Of the variants identified within the enhancer, only

571 those with minor allele frequency greater than 5% were evaluated for association with PD in single-  
572 variant analysis. Associations between individual variants and PD were evaluated using logistic  
573 regression models, adjusted for age at blood draw and sex, and where variants were considered, under  
574 an additive model (i.e. effect of each additional minor allele). Odds ratios and 95% confidence intervals  
575 were estimated and a Bonferroni correction for multiple testing, due to the four common variants that  
576 were evaluated for association with PD, was utilized in single-variant analysis, after which p-values  $\leq$   
577 0.0125 were considered as statistically significant.

578 Genotyping the 25 SNPs across the SNCA locus was performed using the iPLEX Gold protocol on the  
579 MassARRAY System and analysed with TYPER 4.0 software (Agena Bioscience). For the 25 SNPs  
580 genotyped across the SNCA locus, all genotype call rates were  $>95\%$  and there was no evidence for  
581 departure from Hardy-Weinberg equilibrium (all  $\chi^2$  p-values  $> 0.05$  after Bonferroni correction).  
582 Haplotype frequencies in cases and controls was estimated using the haplo.stats package<sup>83</sup> function  
583 “haplo.group”. Associations between haplotypes and risk of PD were evaluated using score tests of  
584 association<sup>84</sup> using the “haplo.score” function. Tests were adjusted for age at blood draw and sex,  
585 haplotypes occurring in less than 1% of subjects were excluded, and only individuals with no missing  
586 genotype calls for any variants were included. A Bonferroni correction for multiple testing was applied,  
587 after which p-values  $\leq 0.0042$  were considered as statistically significant, due to the 12 different  
588 common haplotypes that were observed and tested for association with PD risk.

### 589 **Protein array testing differential binding**

590 HuProt v3.1 human proteome microarrays printed on the PATH surface containing  $>20,000$  unique  
591 proteins representing 16,152 genes (CDI laboratories)<sup>40</sup> were blocked with 25mM HEPES pH 8.0, 50mM  
592 K Glutamate, 8mM MgCl<sub>2</sub>, 3mM DTT, 10% glycerol, 0.1% Triton X-100, 3% BSA on an orbital shaker at  
593 4°C for  $\geq 3$  hours. Allele specific protein-DNA binding interactions were identified through dye-swap  
594 competition of major and minor alleles labeled with either Cy3 or Cy5. DNA fragments for rs2737024  
595 and rs2583959 were synthesized with the SNP for each allele flanked by 15 nucleotides of the upstream  
596 and downstream sequence and a common priming site at the 3' end (**Supplementary Table 5**).

597 The dsDNA fragments were created by separately annealing a primer containing a Cy3 or Cy5 label and  
598 adding Klenow (NEB) with dNTP to fill-in the complementary strand for each allele<sup>85</sup>. Cy3 labeled major  
599 allele was mixed with Cy5 labeled minor allele (each at 40nM) in 1x hybridization buffer (10mM TrisCl  
600 pH 8, 50mM KCl, 1mM MgCl<sub>2</sub>, 1mM DTT, 5% glycerol, 10 $\mu$ M ZnCl<sub>2</sub>, 3mg/mL BSA) and added to an array,

601 dyes were then swapped for each allele and the mixture was then added to a second array. DNA was  
602 allowed to bind overnight at 4°C on an orbital shaker with protection from light. Chips were washed  
603 once with cold 1xTBS (0.1% Triton X-100) for 5 minutes at 4°C, rinsed, and dried in the centrifuge. Cy5  
604 and Cy3 images were taken separately on a Genepix 4000B scanner and, after alignment to the .gal file,  
605 individual spot intensities were extracted using the Genepix Pro software.

606 Allele specific interactions were identified through dye swap analysis. The ratio of major/minor allele  
607 binding was calculated using the duplicate spot average median foreground signal for each protein

608 according to the following equation: 
$$\log_2 \sqrt{\frac{Cy3_{major} * Cy5_{major}}{Cy3_{minor} * Cy5_{minor}}}$$

609 Mean intensity was calculated by averaging the foreground signal for the Cy3 and Cy5 channels of the  
610 major and minor alleles. MA plots were made for each allele using the calculated mean intensity and the  
611 log ratio of the major/minor allele.

612

613 **DATA AVAILABILITY**

614 ATAC-sequencing and RNA-sequencing data will be available at the Gene Expression Omnibus (GEO)  
615 under the accession number GSEXXXXXX.

616 **ACKNOWLEDGEMENTS**

617 This research undertaken at Johns Hopkins University School of Medicine was supported in part by  
618 awards from NIH (NS62972 and MH106522 to ASM; GM111514 to HZ; HG007348 to MAB). The Mayo  
619 Clinic collection was supported in part by a Morris K. Udall Center of Excellence in Parkinson's disease  
620 Research (P50 NS072187), American Parkinson's Disease Association Center and The Mangurian  
621 Foundation for Lewy body research. OAR is supported by NS078086 and NS10069 (NIH), W81XWH-17-1-  
622 0249 (Department of Defense), The Michael J. Fox Foundation and The Little Family Foundation. ZKW is  
623 supported by the Mayo Clinic Center for Regenerative Medicine, Mayo Clinic Center for Individualized  
624 Medicine, Mayo Clinic Neuroscience Focused Research Team (Cecilia and Dan Carmichael Family  
625 Foundation, and the James C. and Sarah K. Kennedy Fund for Neurodegenerative Disease Research at  
626 Mayo Clinic in Florida), the gift from Carl Edward Bolch, Jr., and Susan Bass Bolch, The Sol Goldman  
627 Charitable Trust, and Donald G. and Jodi P. Heeringa. Research conducted at the E.O. Lawrence Berkeley  
628 National Laboratory was performed under U.S. Department of Energy contract DE-AC02-05CH11231,  
629 University of California and was supported by HG003988 (NIH) to LAP.

630 **AUTHOR CONTRIBUTIONS**

631 SAM, ASM designed the study and wrote the paper. SAM, PWH, XR, WDL, SJK, and ELW performed  
632 various experiments. Transgenic experiments were performed by SAM, NJB, and JFT (zebrafish) and by  
633 SAM, JAA, DED, AV, and LP (mice). SAM and MAB performed the gkm-SVM analyses. PD patient  
634 sequencing and analysis was performed by SAM, AIS, MGH, NND, ZKW, and OAR. SAM, CDM, and HZ  
635 performed and analysed differential protein array binding assays. SAM implemented the computational  
636 algorithms to process the raw data and conduct analyses thereof. SAM and ASM analyzed and  
637 interpreted the resulting data. SAM contributed novel computational pipeline development. SAM and  
638 ASM wrote the manuscript, with all other authors contributing. Correspondence to ASM  
639 ([andy@jhmi.edu](mailto:andy@jhmi.edu)).

640 **FINANCIAL INTERESTS STATEMENT**

641 The authors declare no competing financial interests.

642 **REFERENCES**

- 643 1. Ma, S. Y., Roytta, M., Rinne, J. O., Collan, Y. & Rinne, U. K. Correlation between  
644 neuromorphometry in the substantia nigra and clinical features in Parkinson's disease using  
645 disector counts. *J. Neurol. Sci.* **151**, 83–87 (1997).
- 646 2. Fearnley, J. M. & Lees, A. J. Ageing and Parkinson's disease: substantia nigra regional selectivity.  
647 *Brain* **114 ( Pt 5)**, 2283–2301 (1991).
- 648 3. Pringsheim, T., Jette, N., Frolkis, A. & Steeves, T. D. L. The prevalence of Parkinson's disease: a  
649 systematic review and meta-analysis. *Mov. Disord.* **29**, 1583–1590 (2014).
- 650 4. Thomas, B. & Beal, M. F. Parkinson's disease. *Hum. Mol. Genet.* **16 Spec No**, R183-94 (2007).
- 651 5. Zarranz, J. J. *et al.* The new mutation, E46K, of alpha-synuclein causes Parkinson and Lewy body  
652 dementia. *Ann. Neurol.* **55**, 164–173 (2004).
- 653 6. Kruger, R. *et al.* Ala30Pro mutation in the gene encoding alpha-synuclein in Parkinson's disease.  
654 *Nature Genetics* **18**, 106–108 (1998).
- 655 7. Polymeropoulos, M. H. *et al.* Mutation in the alpha-synuclein gene identified in families with  
656 Parkinson's disease. *Science* **276**, 2045–2047 (1997).
- 657 8. Singleton, A. B. *et al.* alpha-Synuclein locus triplication causes Parkinson's disease. *Science* **302**,  
658 841 (2003).
- 659 9. Nalls, M. A. *et al.* Large-scale meta-analysis of genome-wide association data identifies six new  
660 risk loci for Parkinson's disease. *Nat. Genet.* **46**, 989–993 (2014).
- 661 10. Chang, D. *et al.* A meta-analysis of genome-wide association studies identifies 17 new Parkinson's  
662 disease risk loci. *Nat. Genet.* **49**, 1511–1516 (2017).
- 663 11. Maurano, M. T. *et al.* Systematic localization of common disease-associated variation in  
664 regulatory DNA. *Science* **337**, 1190–1195 (2012).
- 665 12. Schaub, M. A., Boyle, A. P., Kundaje, A., Batzoglou, S. & Snyder, M. Linking disease associations  
666 with regulatory information in the human genome. *Genome Res.* **22**, 1748–1759 (2012).
- 667 13. Ernst, J. *et al.* Mapping and analysis of chromatin state dynamics in nine human cell types. *Nature*  
668 **473**, 43–49 (2011).

- 669 14. Boyle, E. A., Li, Y. I. & Pritchard, J. K. An Expanded View of Complex Traits: From Polygenic to  
670 Omnigenic. *Cell* **169**, 1177–1186 (2017).
- 671 15. Lee, D. *et al.* A method to predict the impact of regulatory variants from DNA sequence. *Nat.*  
672 *Genet.* **47**, 955–961 (2015).
- 673 16. Praetorius, C. *et al.* A polymorphism in IRF4 affects human pigmentation through a tyrosinase-  
674 dependent MITF/TFAP2A pathway. *Cell* **155**, 1022–1033 (2013).
- 675 17. Buenrostro, J. D., Giresi, P. G., Zaba, L. C., Chang, H. Y. & Greenleaf, W. J. Transposition of native  
676 chromatin for fast and sensitive epigenomic profiling of open chromatin, DNA-binding proteins  
677 and nucleosome position. *Nat. Methods* **10**, 1213–8 (2013).
- 678 18. Heintz, N. Gene expression nervous system atlas (GENSAT). *Nat. Neurosci.* **7**, 483 (2004).
- 679 19. Robinson, J. T. *et al.* Integrative genomics viewer. *Nature Biotechnology* **29**, 24–26 (2011).
- 680 20. Thorvaldsdottir, H., Robinson, J. T. & Mesirov, J. P. Integrative Genomics Viewer (IGV): high-  
681 performance genomics data visualization and exploration. *Brief. Bioinform.* **14**, 178–192 (2013).
- 682 21. Thurman, R. E. *et al.* The accessible chromatin landscape of the human genome. *Nature* **489**, 75–  
683 82 (2012).
- 684 22. Visel, A., Minovitsky, S., Dubchak, I. & Pennacchio, L. A. VISTA Enhancer Browser--a database of  
685 tissue-specific human enhancers. *Nucleic Acids Res.* **35**, D88–92 (2007).
- 686 23. Stott, S. R. W. *et al.* Foxa1 and foxa2 are required for the maintenance of dopaminergic  
687 properties in ventral midbrain neurons at late embryonic stages. *J. Neurosci.* **33**, 8022–8034  
688 (2013).
- 689 24. Arenas, E. Foxa2: the rise and fall of dopamine neurons. *Cell Stem Cell* **2**, 110–112 (2008).
- 690 25. Prakash, N. & Wurst, W. Development of dopaminergic neurons in the mammalian brain. *Cell.*  
691 *Mol. Life Sci.* **63**, 187–206 (2006).
- 692 26. Smits, S. M., Ponnio, T., Conneely, O. M., Burbach, J. P. H. & Smidt, M. P. Involvement of Nurr1 in  
693 specifying the neurotransmitter identity of ventral midbrain dopaminergic neurons. *Eur. J.*  
694 *Neurosci.* **18**, 1731–1738 (2003).
- 695 27. Hook, P. W. *et al.* Single-Cell RNA-Seq of Mouse Dopaminergic Neurons Informs Candidate Gene

- 696 Selection for Sporadic Parkinson Disease. *Am. J. Hum. Genet.* **102**, 427–446 (2018).
- 697 28. Ghandi, M., Lee, D., Mohammad-Noori, M. & Beer, M. A. Enhanced regulatory sequence  
698 prediction using gapped k-mer features. *PLoS Comput. Biol.* **10**, e1003711 (2014).
- 699 29. Kittappa, R., Chang, W. W., Awatramani, R. B. & McKay, R. D. G. The *foxa2* gene controls the birth  
700 and spontaneous degeneration of dopamine neurons in old age. *PLoS Biol.* **5**, e325 (2007).
- 701 30. Caiazzo, M. *et al.* Direct generation of functional dopaminergic neurons from mouse and human  
702 fibroblasts. *Nature* **476**, 224–227 (2011).
- 703 31. Wang, Y. *et al.* The 3D Genome Browser: a web-based browser for visualizing 3D genome  
704 organization and long-range chromatin interactions. *bioRxiv* (2017). at  
705 <<http://biorxiv.org/content/early/2017/02/27/112268.abstract>>
- 706 32. Zarow, C., Lyness, S. A., Mortimer, J. A. & Chui, H. C. Neuronal loss is greater in the locus  
707 coeruleus than nucleus basalis and substantia nigra in Alzheimer and Parkinson diseases. *Arch.*  
708 *Neurol.* **60**, 337–341 (2003).
- 709 33. Kastnerhuber, E., Kratochwil, C. F., Ryu, S., Schweitzer, J. & Driever, W. Genetic dissection of  
710 dopaminergic and noradrenergic contributions to catecholaminergic tracts in early larval  
711 zebrafish. *J. Comp. Neurol.* **518**, 439–458 (2010).
- 712 34. Rink, E. & Wullimann, M. F. The teleostean (zebrafish) dopaminergic system ascending to the  
713 subpallium (striatum) is located in the basal diencephalon (posterior tuberculum). *Brain Res.* **889**,  
714 316–330 (2001).
- 715 35. Seidel, K. *et al.* The brainstem pathologies of Parkinson’s disease and dementia with Lewy bodies.  
716 *Brain Pathol.* **25**, 121–135 (2015).
- 717 36. Wakabayashi, K., Mori, F., Tanji, K., Orimo, S. & Takahashi, H. Involvement of the peripheral  
718 nervous system in synucleinopathies, tauopathies and other neurodegenerative proteinopathies  
719 of the brain. *Acta Neuropathol.* **120**, 1–12 (2010).
- 720 37. Wakabayashi, K. & Takahashi, H. Neuropathology of autonomic nervous system in Parkinson’s  
721 disease. *Eur. Neurol.* **38 Suppl 2**, 2–7 (1997).
- 722 38. Braak, H. *et al.* Amygdala pathology in Parkinson’s disease. *Acta Neuropathol.* **88**, 493–500  
723 (1994).



- 724 39. Langston, J. W. & Forno, L. S. The hypothalamus in Parkinson disease. *Ann. Neurol.* **3**, 129–133  
725 (1978).
- 726 40. Jeong, J. S. *et al.* Rapid identification of monospecific monoclonal antibodies using a human  
727 proteome microarray. *Mol. Cell. Proteomics* **11**, O111.016253 (2012).
- 728 41. Guella, I. *et al.* alpha-synuclein genetic variability: A biomarker for dementia in Parkinson disease.  
729 *Ann. Neurol.* **79**, 991–999 (2016).
- 730 42. Preissl, S. *et al.* Single-nucleus analysis of accessible chromatin in developing mouse forebrain  
731 reveals cell-type-specific transcriptional regulation. *Nat. Neurosci.* **21**, 432–439 (2018).
- 732 43. Sugiaman-Trapman, D. *et al.* Characterization of the human RFX transcription factor family by  
733 regulatory and target gene analysis. *BMC Genomics* **19**, 181 (2018).
- 734 44. Sung, M.-H., Guertin, M. J., Baek, S. & Hager, G. L. DNase footprint signatures are dictated by  
735 factor dynamics and DNA sequence. *Mol. Cell* **56**, 275–285 (2014).
- 736 45. Greffard, S. *et al.* Motor score of the Unified Parkinson Disease Rating Scale as a good predictor  
737 of Lewy body-associated neuronal loss in the substantia nigra. *Arch. Neurol.* **63**, 584–588 (2006).
- 738 46. Soldner, F. *et al.* Parkinson-associated risk variant in distal enhancer of alpha-synuclein  
739 modulates target gene expression. *Nature* **533**, 95–99 (2016).
- 740 47. The ENCODE Project Consortium. An integrated encyclopedia of DNA elements in the human  
741 genome. *Nature* **489**, 57–74 (2012).
- 742 48. Gupta, R. M. *et al.* A Genetic Variant Associated with Five Vascular Diseases Is a Distal Regulator  
743 of Endothelin-1 Gene Expression. *Cell* **170**, 522–533.e15 (2017).
- 744 49. Westerfeld, M. *The Zebrafish Book. A Guide for the Laboratory Use of Zebrafish (Danio rerio).*  
745 (Univ. Oregon Press, Eugene, 2007).
- 746 50. Langmead, B. & Salzberg, S. L. Fast gapped-read alignment with Bowtie 2. *Nat. Methods* **9**, 357–  
747 359 (2012).
- 748 51. Li, H. *et al.* The Sequence Alignment/Map format and SAMtools. *Bioinformatics* **25**, 2078–2079  
749 (2009).
- 750 52. Zhang, Y. *et al.* Model-based analysis of ChIP-Seq (MACS). *Genome Biol.* **9**, R137 (2008).

- 751 53. Kim, D., Langmead, B. & Salzberg, S. L. HISAT: a fast spliced aligner with low memory  
752 requirements. *Nat. Methods* **12**, 357–360 (2015).
- 753 54. Liao, Y., Smyth, G. K. & Shi, W. The Subread aligner: fast, accurate and scalable read mapping by  
754 seed-and-vote. *Nucleic Acids Res.* **41**, e108 (2013).
- 755 55. Huber, W. *et al.* Orchestrating high-throughput genomic analysis with Bioconductor. *Nat.*  
756 *Methods* **12**, 115–121 (2015).
- 757 56. Gentleman, R. C. *et al.* Bioconductor: open software development for computational biology and  
758 bioinformatics. *Genome Biol.* **5**, R80 (2004).
- 759 57. Mudge, J. M. & Harrow, J. Creating reference gene annotation for the mouse C57BL6/J genome  
760 assembly. *Mamm. Genome* **26**, 366–378 (2015).
- 761 58. Zhao, H. *et al.* CrossMap: a versatile tool for coordinate conversion between genome assemblies.  
762 *Bioinformatics* **30**, 1006–1007 (2014).
- 763 59. Ye, J. *et al.* Primer-BLAST: a tool to design target-specific primers for polymerase chain reaction.  
764 *BMC Bioinformatics* **13**, 134 (2012).
- 765 60. Quinlan, A. R. & Hall, I. M. BEDTools: a flexible suite of utilities for comparing genomic features.  
766 *Bioinformatics* **26**, 841–842 (2010).
- 767 61. Hansen, K. D., Irizarry, R. A. & Wu, Z. Removing technical variability in RNA-seq data using  
768 conditional quantile normalization. *Biostatistics* **13**, 204–216 (2012).
- 769 62. Wei, T. & Simko, V. corrplot: Visualization of a Correlation Matrix. (2016). at <[https://cran.r-](https://cran.r-project.org/package=corrplot)  
770 [project.org/package=corrplot](https://cran.r-project.org/package=corrplot)>
- 771 63. Neuwirth, E. RColorBrewer: ColorBrewer Palettes. (2014). at <[https://cran.r-](https://cran.r-project.org/package=RColorBrewer)  
772 [project.org/package=RColorBrewer](https://cran.r-project.org/package=RColorBrewer)>
- 773 64. Schwalb, B., Tresch, A., Torkler, P., Duemcke, S. & Demel, C. LSD: Lots of Superior Depictions.  
774 (2015). at <<https://cran.r-project.org/package=LSD>>
- 775 65. Siepel, A. *et al.* Evolutionarily conserved elements in vertebrate, insect, worm, and yeast  
776 genomes. *Genome Res.* **15**, 1034–1050 (2005).
- 777 66. Liu, T. *et al.* Cistrome: an integrative platform for transcriptional regulation studies. *Genome Biol.*

- 778           **12**, R83 (2011).
- 779   67.   Karolchik, D. *et al.* The UCSC Table Browser data retrieval tool. *Nucleic Acids Res.* **32**, D493-6  
780           (2004).
- 781   68.   McLean, C. Y. *et al.* GREAT improves functional interpretation of cis-regulatory regions. *Nat.*  
782           *Biotechnol.* **28**, 495–501 (2010).
- 783   69.   Pennacchio, L. A. *et al.* In vivo enhancer analysis of human conserved non-coding sequences.  
784           *Nature* **444**, 499–502 (2006).
- 785   70.   Poulin, F. *et al.* In vivo characterization of a vertebrate ultraconserved enhancer. *Genomics* **85**,  
786           774–781 (2005).
- 787   71.   Kothary, R. *et al.* Inducible expression of an hsp68-lacZ hybrid gene in transgenic mice.  
788           *Development* **105**, 707–714 (1989).
- 789   72.   Fisher, S. *et al.* Evaluating the biological relevance of putative enhancers using Tol2 transposon-  
790           mediated transgenesis in zebrafish. *Nat. Protoc.* **1**, 1297–1305 (2006).
- 791   73.   Zorita, E., Cusco, P. & Fillion, G. J. Starcode: sequence clustering based on all-pairs search.  
792           *Bioinformatics* **31**, 1913–1919 (2015).
- 793   74.   Sievers, F. *et al.* Fast, scalable generation of high-quality protein multiple sequence alignments  
794           using Clustal Omega. *Mol. Syst. Biol.* **7**, 539 (2011).
- 795   75.   Bailey, T. L. & Elkan, C. Fitting a mixture model by expectation maximization to discover motifs in  
796           biopolymers. *Proceedings. Int. Conf. Intell. Syst. Mol. Biol.* **2**, 28–36 (1994).
- 797   76.   Gupta, S., Stamatoyannopoulos, J. A., Bailey, T. L. & Noble, W. S. Quantifying similarity between  
798           motifs. *Genome Biol.* **8**, R24 (2007).
- 799   77.   Pique-Regi, R. *et al.* Accurate inference of transcription factor binding from DNA sequence and  
800           chromatin accessibility data. *Genome Res.* **21**, 447–455 (2011).
- 801   78.   Grant, C. E., Bailey, T. L. & Noble, W. S. FIMO: scanning for occurrences of a given motif.  
802           *Bioinformatics* **27**, 1017–1018 (2011).
- 803   79.   Adey, A. *et al.* Rapid, low-input, low-bias construction of shotgun fragment libraries by high-  
804           density in vitro transposition. *Genome Biol.* **11**, R119 (2010).

- 805 80. Ramirez, F. *et al.* deepTools2: a next generation web server for deep-sequencing data analysis.  
806 *Nucleic Acids Res.* **44**, W160-5 (2016).
- 807 81. Hughes, A. J., Daniel, S. E., Kilford, L. & Lees, A. J. Accuracy of clinical diagnosis of idiopathic  
808 Parkinson's disease: a clinico-pathological study of 100 cases. *J. Neurol. Neurosurg. Psychiatry* **55**,  
809 181–184 (1992).
- 810 82. R Core Team. R: A language and environment for statistical computing. (2017). at  
811 <<https://www.r-project.org/>>
- 812 83. Sinnwell, J. P. & Schaid, D. J. haplo.stats: Statistical Analysis of Haplotypes with Traits and  
813 Covariates when Linkage Phase is Ambiguous. (2016). at <[https://cran.r-](https://cran.r-project.org/package=haplo.stats)  
814 [project.org/package=haplo.stats](https://cran.r-project.org/package=haplo.stats) >
- 815 84. Schaid, D. J., Rowland, C. M., Tines, D. E., Jacobson, R. M. & Poland, G. A. Score tests for  
816 association between traits and haplotypes when linkage phase is ambiguous. *Am. J. Hum. Genet.*  
817 **70**, 425–434 (2002).
- 818 85. Hu, S. *et al.* DNA methylation presents distinct binding sites for human transcription factors. *Elife*  
819 **2**, e00726 (2013).
- 820
